# Supplementary material for: TRIM28 regulates the nuclear accumulation and toxicity of both alpha-synuclein and tau
Source: eLife. 2016 Oct 25;5:e19809. doi: 10.7554/eLife.19809 (PMC5104516; doi:10.7554/eLife.19809)
Supplement: Figure 1—source data 1. — Genes screened as well as the individual Z-Scores for the average of triplicate readings are presented for each siRNA/cell line in adjacent columns. Top modifiers retrieved from the primary screens meeting criteria enumerated in Online Methods. Pink column depicts screen done in DsRed-IRES-α-Syn:EGFP cells and a blue column depicts screen done in DsRed-IRES-tau:EGFP cells. Overlapping hits between both screens are indicated in grey. Validation Results from Figure 1—figure supplement 2 summarized in the last columns with legend for color-coded significant changes presented at the bottom. DOI: http://dx.doi.org/10.7554/eLife.19809.004 [file elife-19809-fig1-data1.xlsx]

## Sheet: Screen Summary
Primary Screen								Hit list			Validation
Screened genes	Z-Score							ɑ-Syn Screen Hits	tau Screen Hits		Shared Hits	Down sig			Up sig
	siRNA #1		siRNA #2		siRNA#3
	ɑ-Syn	tau	ɑ-Syn	tau	ɑ-Syn	tau						ɑ-Syn	tau	GFP	ɑ-Syn	tau	GFP
AAK1	0.0995666	0.676515	-1.09798	0.0303519	-0.214576	-0.943803		ABL1	ACP2		TRIM28	3	3	0	0	0	0
AATK	0.390241	2.28004	-0.57743	-0.458134	-0.941266	0.699757		ACP1	ACPP		PPFIA1	3	1	1	0	1	0
ABL1	-1.98014	-1.99197	-2.33856	-1.00974	-0.657141	-0.687082		ACP6	ACVR2B		RPS6KB1	3	0	1	0	0	0
ABL2	0.678685	-0.703024	0.934759	0.861745	0.352305	2.60936		ACVR1	AKT1		STK11	2	1	1	0	1	0
ACP1	1.85423	1.19724	2.4627	2.0033	1.43104	-0.280641		ACVR1C	ALPL		MKNK2	2	0	1	0	0	0
ACP2	-0.971441	-1.60479	-0.362003	1.52063	-1.26135	0.103773		ACVR2A	ALPP		MYLK	2	0	1	0	0	0
ACP5	0.929402	0.531162	0.48856	-0.355293	-1.21925	-0.0507007		ADCK1	ALPPL2		RPS6KA6	2	0	2	0	2	0
ACP6	-2.62041	-1.55149	0.461406	1.26138	-1.67453	-1.53899		ADRBK2	ANKK1		ACVR2A	1	1	0	2	0	0
ACPL2	-0.912376	-0.756278	0.963008	1.25666	-0.874323	-1.14263		AK1	AXL		MELK	1	1	0	1	1	0
ACPP	-2.06193	-1.77031	-0.302281	-1.66356	0.458721	-0.638637		ALDH18A1	BUB1		ACVR1B	1	1	0	0	0	0
ACPT	0.555484	-0.000374266	1.81814	1.563	-2.09196	-1.02588		ALPK2	CALM3		MAPK1	1	1	1	2	2	0
ACVR1	0.294423	0.760644	-1.82673	-0.165547	-2.12887	0.139789		ALPK3	CAMK2B		PPP2CB	1	0	0	2	3	0
ACVR1B	-1.79176	-1.72337	-1.30768	-1.64459	-3.034	-1.6372		AMHR2	CAMKK2		TAOK1	1	0	0	2	2	1
ACVR1C	0.971491	0.105042	-1.59191	1.02249	2.8965	-0.206476		ATR	CASK		TRIB2	1	0	0	1	2	1
ACVR2A	-1.6316	-0.304481	0.767196	-1.50831	-2.40663	-1.67221		AURKA	CDK18		TWF1	1	0	0	1	1	0
ACVR2B	0.510902	1.57514	-0.922945	-1.68902	0.738643	0.26263		BMPR1B	CDK7		PANK3	1	0	1	1	0	0
ACVRL1	0.359737	0.623697	1.13673	1.72753	1.08835	1.56796		BRD3	CDK9		PDK1	1	0	1	1	0	0
ADCK1	1.82653	1.89773	-1.70196	-1.57997	0.455032	-1.18435		CABC	DDR1		MARK3	1	0	1	1	0	1
ADCK2	1.08243	-0.390557	0.265774	1.03579	0.122408	1.376		CALM1	DGKD		TEX14	1	0	1	0	2	0
ADCK4	1.30274	0.0629557	-0.0468372	0.295859	-1.88841	-0.591281		CAMK1	DGKI		GUCY2F	0	2	0	2	1	0
ADCK5	0.213975	0.474013	-1.04307	0.600563	-0.275652	1.17339		CAMKV	DGKZ		INPP1	0	2	0	1	0	0
ADK	-0.619241	-0.564403	-2.12825	-1.9339	-2.16832	-1.56612		CDC25C	DGUOK		EPHA2	0	1	0	1	0	0
ADPGK	-1.84186	-0.0128653	2.1908	2.01932	-0.103715	1.58864		CDC42BPA	EPHB3		ADPGK	0	0	0	3	2	1
ADRBK1	0.18692	-0.473651	0.538019	0.127592	0.0153364	-0.903211		CDKL4	EXOSC10		CDKN3	0	0	0	3	2	1
ADRBK2	-1.66223	1.86234	-1.56433	-0.0537044	-0.0486638	0.911639		CHKA	FBP1		CILP	0	0	0	3	0	1
AGK	0.0573023	-1.51374	1.25856	2.17845	-0.45047	-1.92702		CLK2	FER		SRPK2	0	0	0	2	3	1
AK1	1.5957	-0.219741	3.54158	-0.507805	2.67311	1.29392		CMPK1	IGF2R		CSNK1E	0	0	0	2	2	0
AK3	-0.0231606	0.0480714	0.0651472	-1.34619	0.67388	-1.37514		CSF1R	IMPAD1		MAPK4	0	0	0	2	2	0
AK4	0.24681	-0.709866	0.696182	-0.847408	1.52242	0.51481		CSNK1G3	PIB5PA		CDC7	0	0	0	2	2	1
AK5	0.694541	1.04912	-0.213535	-0.905417	-0.286835	-0.203547		CSNK2A1	IRAK4		PI4K2B	0	0	0	2	1	0
AK7	-0.0636053	-0.277727	-0.806191	-1.62539	0.0865675	-1.10722		CTDSP2	ITPKB		ADK	0	0	0	2	0	0
AKT1	0.916022	-1.51328	0.42817	1.61083	1.00993	0.161458		DCLK1	KIAA1274		BRD2	0	0	0	2	0	0
AKT2	-0.455697	-0.112229	-1.38936	0.532528	0.360213	0.760975		DGKB	LATS1		FGFRL1	0	0	0	1	3	0
AKT3	-0.126889	-0.113591	-0.700612	-0.559561	-0.30063	0.833023		DOLPP1	MAP3K10		PDK2	0	0	0	1	1	0
ALDH18A1	0.607444	-1.69049	-2.57372	-0.484967	-2.07137	-0.586818		DUSP1	MAP3K7		ATM	0	0	0	1	0	0
ALK	-0.280137	-1.80147	0.951879	0.468927	0.557679	-0.849386		DUSP13	MAPKAPK5		DUSP7	0	0	0	1	0	0
ALPI	-0.56803	-0.799311	0.13152	-1.11429	-0.223658	-0.318331		DUSP14	MINK1		MASTL	0	0	0	0	1	0
ALPK1	-1.19162	0.930659	-1.63185	1.52454	-0.229216	0.166691		DUSP15	MPP2		PASK	0	0	0	0	0	0
ALPK2	1.70664	-1.04353	-0.0684556	0.321406	1.56292	0.802376		DUSP18	MTMR2		ENPP2	0	0	1	2	1	0
ALPK3	-1.57432	0.242762	0.0702311	1.90988	2.661	0.759875		DUSP9	NADK		BRD4	0	0	1	2	0	0
ALPL	-0.448904	-1.67228	-0.672604	-1.60961	-0.0478511	0.907212		DYRK2	NPR1		STYX	no siRNA available
ALPP	0.145064	2.24128	-0.0323666	0.725402	0.735814	1.95343		ENPP1	NTRK2
ALPPL2	3.32872	1.82063	0.57182	1.76775	0.277267	0.6551		EPHA10	NUAK1
AMHR2	1.62954	0.133745	1.99165	1.63146	0.0590366	-1.10819		EPHA5	NUAK2		Legend:
ANKK1	-0.188353	-0.280701	-1.18335	-1.69263	-0.532837	1.57044		EPHB6	PAK7
ARAF	0.340848	0.210408	-1.0616	-0.0719933	-0.901206	-0.296214		ERBB3	PDK3		Significant changes	Directionality
ATM	-2.4677	-1.84502	1.60947	-1.13886	0.219271	-1.77597		ERN1	PDP2			Down		Up
ATR	-2.08908	0.0972437	-1.53279	-1.13825	-0.324003	0.566244		EYA1	PDXK		3 siRNAs	3		3
AURKA	-2.02774	-0.281605	-1.62799	0.490481	0.851401	0.0825194		EYA4	PFKFB1		2 siRNAs	2		2
AURKB	-0.302268	1.2577	-0.0667948	1.49133	-0.114336	1.69613		FES	PFKFB2		1 siRNAs	1		1
AURKC	0.783364	-0.423559	1.43362	1.6676	-0.17686	1.12427		FGFR2	PFKFB4		0 siRNAs	0		0
AXL	-0.440922	-0.893272	-0.0726686	-2.03354	-0.727867	-1.63751		MTOR	PKLR
BCKDK	-0.0919224	-0.766661	0.108591	0.1207	1.12709	-0.46641		G6PC	PNKP
BCR	-0.23147	-0.20129	-0.267734	-0.78561	0.247167	1.21014		GAK	PPM1L
BLK	1.14104	0.708973	0.439626	1.08956	0.597019	1.7288		GRK5	PPP1R16A
BMP2K	-1.20754	-2.14832	-0.328739	0.648476	-0.645584	-0.591856		HIPK1	PPP1R3D
BMPR1A	-0.0198625	1.1599	0.946929	-0.221169	1.67516	0.393923		HIPK2	PPP1R9A
BMPR1B	-2.03111	-0.688215	-5.04215	-1.02433	-0.590979	0.0356138		HIPK3	PPP2R2C
BMPR2	0.038577	0.910299	0.0257817	0.987983	0.655702	1.77965		HSPB8	PPP2R3B
BMX	-1.28089	-0.38679	0.763228	2.06865	-0.0303939	-0.649659		HUNK	PPP2R4
BPGM	1.07601	0.396562	0.535466	-0.427763	-1.34664	-0.850393		INPP4B	PRKAA1
BPNT1	-0.0856694	0.782176	-0.771365	-1.64668	-1.34906	0.964079		INPP5D	PSPH
BRAF	-0.844997	-0.0908449	-0.675031	-1.7082	1.47935	-0.816859		INPPL1	PTPN13
BRD2	0.780025	0.23063	1.99513	1.53428	1.64017	1.56005		IPMK	PTPN22
BRD3	1.61339	0.873469	-0.0472342	-1.43298	1.92973	-0.188673		IRAK2	PTPN23
BRD4	1.61927	-1.60446	3.07836	-0.645272	0.824297	-1.61433		ITK	PTPN9
BRDT	0.206703	-0.765465	-0.466399	1.31129	-0.570778	-1.17376		ITPA	PTPRF
BRSK1	0.0782983	0.768298	0.226036	1.26651	-0.804567	-1.94899		JAK1	PTPRK
BRSK2	-0.185996	-1.6883	0.718865	0.209957	-0.868206	-1.06705		KBTBD4	PTPRM
BTK	0.726851	0.0239274	-0.412645	1.35941	-0.625904	0.331423		KDR	PTPRS
BUB1	-1.30082	-1.62251	-0.518972	-0.319206	-1.16727	-1.6846		LCK	PTPRZ1
BUB1B	-0.405507	0.391813	-0.790271	0.870427	-0.124178	-1.21121		PKDCC	RBKS
CABC	0.117828	-1.63527	-1.67046	1.45561	1.56082	0.341474		LYN	RFK
CALM1	1.5677	1.22148	-0.6621	0.457245	-1.77293	-1.0377		MAGI1	RIOK1
CALM2	0.236708	0.0893862	1.59254	1.6773	0.710208	-0.153384		MAP2K3	RIPK3
CALM3	0.719877	0.218747	-1.50313	-1.67054	-1.03007	-1.6366		MAP2K4	RNGTT
CAMK1	0.640505	0.903778	1.60613	1.57495	3.6413	0.0298199		MAP3K14	ROCK2
CAMK1D	-1.38647	-1.27678	0.163113	1.58234	-0.449314	0.571005		MAP3K4	RPS6KA4
CAMK1G	0.373847	1.19706	-0.613514	0.546967	0.994517	-0.0477866		MAP4K3	RPS6KB2
CAMK2A	-0.178812	0.190598	-0.397664	1.58509	0.328137	-0.543282		MAPK11	RYK
CAMK2B	0.748565	-1.62283	0.643896	-0.0300368	0.121022	-1.81867		MAPK13	SBF1
CAMK2D	0.800304	1.59298	1.09512	-0.128859	0.142189	-0.294723		MAPK9	SBF2
CAMK2G	-0.226482	1.549	-0.918597	1.70913	-0.501533	-0.0733599		MARK2	SGK223
CAMK2G	-0.805002	1.53884	-1.18234	-0.106949	-1.17288	1.56366		MAST1	SGPP1
CAMK4	0.710277	1.06799	-0.452352	-1.56777	0.0910193	-0.58622		MAST2	SIK1
CAMKK1	0.1546	0.113289	0.261972	0.675672	1.17079	0.382402		MET	SPEG
CAMKK2	0.361533	1.61245	0.435065	-1.75653	-0.873547	-0.0560517		MTMR1	STK17A
CAMKV	0.256386	1.50041	-2.43574	-0.439856	-2.21859	-0.139314		MTMR3	TTN
CASK	0.802722	-1.5754	0.829321	1.6658	0.277171	-0.437155		MTMR6	TYK2
CCL2	0.995009	1.66239	0.361131	0.222262	0.812134	1.96175		NEK2	TYRO3
CDC14A	-0.124899	-0.200065	-1.2084	-1.06821	-0.00412408	0.622663		NEK4	UCK2
CDC14B	-0.164308	0.754853	0.922339	1.64505	0.130987	-0.60589		NPR2	UHMK1
CDC14C	0.790074	0.699173	0.702333	0.881776	-4.00646	0.104791		NRBP1	ULK1
CDC25A	-1.00997	-1.38151	1.72323	0.982839	0.705263	-0.315868		NRK	WEE1
CDC25B	0.167105	0.0113251	-0.592039	0.740947	0.590987	-0.169646		OXSR1
CDC25C	-1.90862	-0.634033	0.0385367	0.400597	-1.64919	0.408766		PAK6
CDC42BPA	-2.01088	-0.893341	0.0433897	0.113609	-1.59462	-1.21187		PBK
CDC42BPB	0.624925	-0.978414	-0.487803	-1.37349	1.12919	1.44707		CDK18
CDC42BPG	-0.000536606	1.06349	0.433852	0.31223	1.24017	2.02947		PDIK1L
CDC7	-2.0723	1.69732	1.79585	1.72143	-1.11615	0.736382		PDPK1
CDK1	1.88157	0.080745	1.14319	-1.79557	2.11007	-1.06414		PFKP
CDK10	0.342179	0.105783	0.0579082	0.786647	-0.788187	-0.0338377		PGK1
CDK11B	1.56646	0.466365	0.899558	-0.456652	1.81045	-0.336481		PHLPP
CDK12	-0.395402	-0.445208	-0.201467	-1.3986	-0.704895	1.9472		PIK3C2B
CDK13	-0.0609378	0.608233	0.233947	1.53622	0.434761	0.101068		PIK3C3
CDK14	0.967222	0.977002	-0.0799673	0.408725	0.791638	0.147223		PIK3R4
CDK15	0.0918922	1.24063	1.63045	0.194939	0.356906	1.4544		PKM
CDK16	0.317517	1.93458	-0.634018	1.01089	0.863561	1.86212		PKN3
CDK17	-0.460372	1.06166	-1.24881	1.93121	-1.73247	-1.15982		PLK3
CDK18	-1.97099	-1.55753	0.682192	-0.934849	-1.77758	-1.66224		PPEF2
CDK19	0.8335	-0.151109	1.26462	-0.181324	-0.992681	0.337985		PPM1B
CDK2	0.944052	-0.285341	0.225938	-0.277749	0.917237	1.86873		PPM1D
CDK20	-0.314986	-0.221016	0.139787	-0.211954	0.173004	1.53524		PPM1G
CDK4	-0.110156	0.771782	0.415117	0.331657	-0.122738	0.387788		PPP1CB
CDK5	1.18873	0.463792	-0.497868	1.08383	-0.74747	-0.286245		PPP1R15B
CDK6	0.246587	1.90593	-1.28754	0.752745	0.259771	1.15287		PPP1R16B
CDK7	1.27353	-0.781817	-1.40274	-1.65029	1.78226	-1.98292		PPP1R3B
CDK8	0.0493308	-0.10295	0.215199	0.944952	-1.0658	0.3464		PPP2R5A
CDK9	0.662323	1.50737	0.7034	1.60187	-0.159887	0.00348809		PPP2R5C
CDKL1	0.677949	0.485234	-1.04436	-1.36293	0.578358	-1.05187		PPP3CA
CDKL2	-0.0459348	-1.01704	-0.0829335	-1.66958	1.44879	-0.530533		PPP3R1
CDKL3	1.55133	-0.245945	0.451383	-0.259807	0.0636595	-1.998		PPP6C
CDKL4	2.34098	1.82825	1.70511	0.0757618	-0.137298	-0.50159		PRKCA
CDKL5	0.830487	0.690776	0.308287	0.0730895	0.239704	-0.172354		PRKCB
CDKN3	2.3294	1.77587	1.60416	0.910517	1.13327	1.70248		PRKD2
CERK	1.39553	0.962608	-0.161445	0.0945303	1.12577	0.167229		PRKD3
CHEK1	-0.166103	0.855139	-1.87823	0.257827	-0.501	1.86169		PRKG1
CHEK2	0.58319	-0.12152	1.02221	-0.661489	0.319454	-0.953936		PRPS2
CHKA	-1.64054	-0.773734	-2.15223	-0.746743	0.809351	-1.78957		PSKH2
CHUK	-0.414908	2.08955	-0.908137	-0.54351	-0.113418	0.394269		PTP4A2
CILP	2.02075	0.247162	0.393251	1.67773	1.68223	1.61515		PTPN3
CIT	0.698192	-1.81296	2.02757	-0.00100817	0.133914	-0.235743		PTPN7
CKM	0.905026	0.288026	1.3882	-1.23772	0.554218	-0.440095		PTPRN2
CKMT1B	0.337066	-0.462346	0.46969	0.756539	1.05409	0.269721		PTPRQ
CKMT2	-0.655385	0.535197	-0.0303713	0.0500832	-0.0141146	-0.258099		RAF1
CLK1	0.197745	-0.107419	1.35714	1.56996	0.782814	-0.616094		RIOK2
CLK2	0.443144	-0.072133	1.71348	1.28495	1.79514	-1.20519		RIPK1
CLK3	0.27989	1.8519	0.00111422	-1.58915	0.315367	-0.544711		ROR1
CLK4	0.218266	1.04086	-0.291874	-0.83924	-0.0694816	-0.480094		ROR2
CMPK1	-1.92253	-0.0960467	-0.0565182	0.024813	2.05114	1.41986		RPS6KA3
COASY	0.590792	0.760427	0.759232	0.900881	-0.760421	0.877063		SCYL1
COL4A3BP	-0.799049	0.131713	-0.117821	0.55785	-0.383836	-0.311582		SGK3
CRKL	-0.89026	-0.626891	1.45016	0.180999	0.175712	-0.6549		SIK2
CSF1R	1.61897	0.0511263	-1.36978	0.056561	2.00462	-0.62906		SRC
CSK	0.715079	-1.64455	0.266353	-0.0701209	2.29635	-0.143228		SRPK1
CSNK1A1	0.531241	-0.532504	-0.509287	0.615717	-0.822978	0.105211		STK25
CSNK1A1L	0.516855	0.775024	-0.889819	-1.2342	-0.834872	0.625678		STK33
CSNK1D	-1.05831	0.0194129	0.371399	-1.80657	-0.307594	-1.82165		STK35
CSNK1E	2.70182	-0.690563	-1.04247	-1.88612	-2.85617	-1.72563		STK36
CSNK1G1	-0.319651	0.957981	0.395545	0.509642	-0.208508	0.432847		TBK1
CSNK1G2	0.343756	1.68121	-1.06171	1.25988	-0.881086	0.623062		TEK
CSNK1G3	-1.5758	-1.59474	5.08614	2.07903	-0.256571	-0.913799		TGFBR2
CSNK2A1	1.57818	1.95053	-0.278443	1.75342	2.81931	-0.247914		TNNI3K
CSNK2A2	1.75928	0.341845	1.47805	0.861897	0.462886	1.78157		TRIB1
CTDP1	-0.723033	1.42396	-0.485891	0.170196	0.598396	-0.644721		TRIM27
CTDSP1	-0.812054	-1.07235	-2.1455	-1.13358	0.581288	-0.17553		TRIO
CTDSP2	-1.29996	-0.296775	1.53525	0.707605	1.61886	-0.368559		TRRAP
CTDSPL	-0.583499	-1.60936	0.604184	0.197943	-0.84731	-1.61166		TSSK2
DAPK1	-0.130121	1.02915	0.31188	0.143314	-0.392128	-0.521957		TSSK4
DAPK2	-0.265485	-1.68014	0.130729	-0.102192	-0.35397	1.83667		TTK
DAPK3	-0.260346	0.738671	0.0816686	1.00988	-1.28159	-0.119445		TXK
DAPP1	-1.91823	-1.99649	-1.00932	-1.76644	0.71957	2.02965		UCK1
DCLK1	-1.73647	-0.356716	0.89768	0.90241	-1.83144	-1.09407		ULK2
DCLK2	0.903646	-0.634604	1.12992	-0.605181	-0.0091386	1.26433		ULK4
DCLK3	1.87933	1.53514	-0.0679465	-0.877935	0.156592	1.43761		WNK1
DDR1	0.441081	-1.75736	-0.348017	-1.56991	1.004	0.489068		XYLB
DDR2	-0.0307799	0.390149	0.0511114	0.198649	-1.34629	-1.4176		YES1
DGKA	0.60203	-0.764565	5.63888	-0.642687	-0.150338	0.725372
DGKB	-2.03585	-1.09324	1.92513	1.16515	2.06479	-0.200533
DGKD	-0.132377	1.13362	0.42345	1.60527	1.60545	1.99432
DGKE	-0.0855044	-1.43792	0.151337	-1.45439	0.935507	0.940398
DGKG	0.288754	0.226793	1.20369	1.07779	1.12303	-0.239255
DGKH	-0.0248337	0.309327	-0.759276	0.530988	0.865975	-0.0259546
DGKI	-1.04014	-1.57308	-0.586197	-1.72059	-1.04543	-0.0503044
DGKQ	-0.13195	0.620174	-0.851839	-0.178749	0.0420376	1.04793
DGKZ	-0.581663	0.187383	-0.628683	-1.67655	-1.08334	1.62736
DGUOK	-1.39272	-1.69744	-0.777398	-1.06289	0.112873	-1.72485
DLG1	1.26045	1.81809	-0.206163	1.83863	0.0921077	0.4099
DLG2	-0.220845	0.0919172	-0.773571	0.0981154	0.365246	0.0307346
DLG3	-0.681029	-0.0511652	0.0447771	0.0452906	1.0558	-0.323928
DLG4	-0.426624	0.478297	0.791016	1.9974	0.157784	-1.17968
DMPK	-0.501381	0.109949	-1.41692	-0.184466	-1.19802	0.873477
DNAJC6	0.858713	0.308235	-0.524257	-0.856049	-0.147463	-0.611641
DOLPP1	-1.81318	-0.509428	-1.35355	-1.32409	-1.59173	-0.589624
DSTYK	-0.904223	-1.32458	0.398125	0.0874632	-0.719795	-2.10898
DTYMK	0.218093	-0.259034	0.0181175	0.662975	0.269043	1.72518
DUPD1	-1.10507	-0.00781697	-1.84076	-0.700537	0.0767696	-0.18225
DUSP1	-2.15886	-1.4063	-1.60453	-1.86434	0.29064	1.98297
DUSP10	-0.194749	-0.0424534	-1.55443	1.4464	0.787375	-0.199117
DUSP11	-0.40274	-0.0032488	-0.217737	-0.572556	0.795617	0.421548
DUSP12	-0.207296	1.02496	-1.31473	-0.233037	0.570305	-0.117286
DUSP13	-2.39064	-0.76154	0.63228	0.196865	-1.98167	-0.629682
DUSP14	0.827661	0.582006	-2.11245	-0.124102	1.57313	0.960889
DUSP15	-1.52371	-0.0355699	-0.478996	-0.144323	-1.77793	-0.0198017
DUSP16	2.36125	1.56179	-0.373068	-0.0997835	0.135394	-0.790061
DUSP18	-1.75376	0.947288	-1.58949	1.08444	-0.537104	-0.911799
DUSP19	-0.223061	-1.73165	-1.65766	-1.81317	1.1165	-0.460962
DUSP2	-2.10074	-1.06423	-1.06135	-0.763852	0.287383	0.176725
DUSP21	-0.243714	-0.0578139	-0.639949	-0.203965	-0.0117415	0.223785
DUSP22	1.07446	-0.472219	-0.519398	-0.328105	-1.01653	2.19904
DUSP23	0.923429	0.961099	-0.0644324	-2.23978	-1.37506	0.889288
DUSP24	0.452101	0.377776	-0.968624	-1.58024	-1.34784	0.770201
DUSP26	-0.144225	-1.07153	-0.432087	-0.418649	-1.30354	-0.039426
DUSP3	-0.0951968	-0.273288	0.83557	0.121936	-0.286506	-1.44663
DUSP4	0.495771	0.369258	0.384718	1.49797	-1.98988	-1.85906
DUSP5	-0.873115	-0.91736	-0.4382	-0.389597	-1.68497	-0.000938333
DUSP6	-0.289074	1.12536	-0.65624	-1.30323	1.90521	1.88459
DUSP7	-0.841587	-0.664892	-1.73138	-1.88711	-1.76877	-1.66286
DUSP8	-0.258903	-1.17814	-0.861029	-0.206301	0.0709526	0.129448
DUSP9	-1.53499	-1.41454	0.917068	0.536061	1.58387	0.358212
DYRK1A	0.160556	-0.258834	-0.465954	-1.22268	0.26891	-0.123594
DYRK1B	0.177861	0.183798	-0.619502	0.0717985	1.42611	-1.64182
DYRK2	0.295763	-1.78974	2.13908	-0.779311	2.84127	-0.104688
DYRK3	2.43064	1.96533	1.1929	-0.292752	0.13756	-1.24598
DYRK4	0.783243	0.518237	-0.0506133	-0.160177	-0.0690533	0.761376
EEF2K	1.35745	-1.45732	0.319261	-0.954782	1.77899	-0.00774653
EGFR	3.67598	-0.351291	0.523266	-0.517561	1.11921	-0.699564
EIF2AK1	0.160935	-0.0612006	-0.164366	1.13142	0.387652	0.0621606
EIF2AK2	0.0438986	-0.621469	-0.681212	0.465259	0.0364224	-1.00231
EIF2AK3	0.472017	0.241567	0.00785981	-0.023289	1.289	0.0130034
EIF2AK4	0.170151	-0.544445	0.232905	0.329487	-0.0435925	1.22173
ENPP1	-0.394624	0.0669355	1.83524	0.708461	-1.66164	-1.89575
ENPP2	0.722276	2.1397	-1.67452	-0.857161	1.81217	2.16511
ENPP3	-0.833213	-1.77457	-0.692554	1.50378	-4.28546	-2.21443
EPHA1	-0.0723504	-1.77545	1.70363	-0.434671	1.17033	-0.398572
EPHA10	2.07861	-0.588902	0.571648	1.97107	1.75186	1.74304
EPHA2	-1.63942	-1.59832	-0.236382	-0.209798	-1.62736	-1.68545
EPHA3	1.78087	-0.575479	0.142516	-0.780768	1.08264	0.286335
EPHA4	0.62944	0.194537	-0.343387	-0.435477	0.877971	0.672467
EPHA5	-1.84214	0.211653	-0.319799	-0.0583841	-2.02578	-0.646443
EPHA7	1.01961	0.737018	0.545161	0.373245	0.257465	0.771561
EPHA8	0.15006	-0.725443	1.27756	1.54824	0.0887464	-0.475195
EPHB1	0.138692	0.394266	-1.22056	0.711304	-0.00649723	0.330974
EPHB2	-0.0470189	0.337731	-0.666633	-0.582475	0.179909	0.659911
EPHB3	-0.0852428	-1.71131	0.408462	-1.86342	0.820056	-1.77195
EPHB4	0.969667	0.367941	-0.215779	-1.126	-0.50814	0.0527429
EPHB6	2.15997	0.801079	0.912213	1.20994	1.78111	1.74174
EPM2A	0.0382663	0.473462	-0.491101	1.28772	0.0316781	1.65144
ERBB2	0.231309	1.18194	-0.598949	0.254825	0.0383594	-0.901572
ERBB3	2.05373	0.381506	2.40735	1.71981	0.353107	1.41657
ERBB4	0.152658	0.664749	0.21607	1.62579	-0.545921	0.541398
ERN1	-3.44873	-1.27496	-0.576926	0.296337	-1.57677	-1.53059
ERN2	0.372244	-0.0472827	0.593158	-0.507143	-0.286255	-1.35748
ETNK1	0.489637	-0.347597	-0.926621	-0.38231	1.50127	1.89698
ETNK2	0.503329	2.08585	-0.877971	-0.893028	-0.933752	-0.28205
EXOSC10	0.706506	1.54988	-1.64245	-0.0480115	-2.20265	-1.69496
EYA1	1.80951	0.582902	-0.343348	-0.0119788	1.61913	0.217734
EYA2	-0.0462722	-1.29418	-0.896919	-0.165405	1.33298	-1.09883
EYA3	1.04279	0.727598	-0.223333	1.64067	0.229415	0.210671
EYA4	-0.965291	0.133663	-1.6571	0.374339	1.74322	1.57974
FBP1	-0.0532932	-0.343946	0.342498	1.51143	-0.166225	1.65785
FBP2	-1.26646	-0.462004	-0.314048	1.52556	0.0101457	1.28616
FER	-0.390938	1.60791	0.114716	0.230681	0.574445	1.89906
FES	-0.0280307	0.939048	1.7538	0.6867	1.82732	0.311634
FGFR2	2.25483	1.43552	1.54797	-1.55391	0.895176	0.857536
FGFR3	1.03344	1.25575	0.589601	0.202596	0.297319	0.506903
FGFR4	0.544697	0.165779	-0.139828	0.727198	0.748587	-0.702886
FGFRL1	2.01952	2.10269	-0.257373	2.08192	2.03692	1.97106
FGR	-1.12307	-1.52933	0.909447	-0.475624	1.19988	-0.496328
FLJ30092	-0.746061	-0.859929	1.76499	2.23521	0.11108	0.753798
FLT1	0.656586	0.817124	0.416423	0.836429	0.981251	0.937494
FLT3	-0.159151	0.23598	-0.639938	3.1092	0.00737756	1.00748
FLT4	0.345633	0.560578	-0.86517	-0.124567	0.666718	-0.148762
FN3K	-0.582021	-0.415906	0.11737	-0.960884	0.809633	1.22802
FRK	0.698141	0.602643	0.517138	-1.66147	0.422411	1.12522
FUK	0.566373	1.15426	-0.514426	1.35611	0.895308	0.304351
FXN	-0.93907	-1.86517	0.313629	-0.790077	0.717723	0.325343
FYN	-0.0879732	-0.753496	-0.739629	-1.47266	-1.56881	-0.605162
G6PC	-1.49685	1.28182	-1.86819	-0.957742	-0.736012	-0.320626
GAK	0.319898	0.92636	-1.55664	0.425198	-2.00027	0.994576
GALK2	-0.0688994	-0.661587	-0.322778	-1.5526	-0.769772	-0.438098
GCK	-0.410582	0.291109	-0.083838	0.488015	1.34827	-0.717189
GK2	0.149607	0.543462	0.760553	0.0760138	-0.303103	0.858759
GNE	-0.23745	0.477862	-1.21908	1.11684	0.332138	0.60286
GRK1	0.442557	-0.344967	0.185758	0.56944	-0.200288	-0.625183
GRK4	-1.00375	-0.201268	-0.521208	1.35791	-1.26779	1.82258
GRK5	-1.58411	-1.20454	2.30298	-0.375163	-0.3542	-0.638834
GRK6	0.790336	0.386017	0.696366	0.30255	-0.392365	0.374038
GRK7	-0.0174496	0.23625	-0.791848	0.303569	-1.12041	0.10611
GSG2	-0.758996	1.3419	-0.958915	-0.126672	-1.25851	0.0736404
GSK3A	0.618685	-0.621952	0.837636	1.51356	0.975201	1.80524
GSK3B	-0.465923	-0.37369	0.473831	-0.102943	-0.0703426	0.117471
GUCY2C	0.0982734	0.551499	-1.17557	-0.413259	-0.229802	0.0570037
GUCY2D	0.710834	-0.0946022	0.341224	1.39758	-0.785941	-1.38643
GUCY2F	-1.77251	-1.53788	0.938509	1.76602	-2.03705	-0.196844
HCK	-1.3735	0.361476	0.0458339	0.304145	-0.879547	-0.679049
HIPK1	1.60139	1.68323	0.26404	-0.345675	2.20327	0.674827
HIPK2	1.65102	-1.10159	2.63429	1.1896	0.78519	0.0198279
HIPK3	1.66639	0.542864	-1.82377	0.813206	-0.194143	-0.0959258
HIPK4	0.378631	0.424561	-0.526681	-0.686995	0.706315	-1.14236
HK1	-0.369865	-1.16791	1.75244	1.90385	0.69065	1.67194
HK2	0.303854	-0.0131949	0.0191199	2.09092	1.19788	1.2434
HK3	-0.127308	0.733646	0.158059	-0.559274	0.809742	1.29962
HSPB8	-1.60841	-0.329517	-3.88986	1.51602	0.484992	1.82315
HUNK	0.742927	-0.17199	2.08065	1.08324	-1.81003	-0.313421
ICK	0.971044	0.389763	-0.299746	-0.880122	0.915208	1.94035
IGF1R	0.758077	-1.4057	0.844227	1.47014	0.346035	-0.4887
IGF2R	-0.350895	-1.62553	-0.0864838	-0.273648	0.423659	-1.59762
IKBKB	0.328813	-0.113066	0.512471	-0.975816	-1.98129	0.325999
IKBKE	-0.862409	1.06532	-0.200128	-0.703494	-0.512882	1.19565
ILK	-0.490927	-0.838477	-0.266865	1.21105	-0.230307	-0.32008
IMPA1	0.295205	-0.674523	0.205931	-0.141949	-1.71454	0.078532
IMPA2	-1.8919	-1.43452	-0.412411	-1.75008	-1.0114	0.239618
IMPAD1	-0.822863	1.58724	0.0917865	-0.0543797	0.0707347	1.58427
INPP1	-1.74873	-1.5619	-0.343682	1.5497	-1.90041	0.331624
INPP4A	0.619787	-0.540793	-1.07531	-1.36764	1.36138	-1.09134
INPP4B	-1.62112	-0.24203	-1.72235	-1.13069	0.113813	0.347695
INPP5A	-0.0114085	0.983347	-1.1343	-0.709742	0.831915	-1.39989
INPP5B	0.179691	-0.914103	-0.366684	0.153138	0.547672	-0.822882
INPP5D	-1.96998	0.155359	-0.648279	-1.53211	-2.31306	-1.57781
INPP5E	-0.579557	0.000630081	-0.510215	-0.705863	-0.301873	-0.106414
INPP5F	-0.337845	-0.571249	0.907232	-0.0940209	0.915735	-2.45465
INPPL1	-1.63327	-1.6347	-1.08649	-0.206088	-1.52788	1.53067
INSR	1.16734	-0.454954	-0.547147	0.529505	0.620544	-0.226671
INSRR	-0.115057	-1.08128	0.0487111	1.8574	0.102176	-1.79944
IP6K1	0.0748517	0.5017	0.306861	1.68149	1.2585	-0.950945
IP6K3	0.577199	1.51349	-0.0355424	0.167556	0.918832	-1.63545
IPMK	1.90976	-0.160767	0.337362	-0.272683	3.16251	1.52151
IRAK1	0.786941	0.0929777	0.0265206	0.536392	0.685668	1.82715
IRAK2	-1.73741	0.43267	-1.6416	0.966039	-0.085612	-0.272958
IRAK3	-0.806096	1.58828	0.467367	1.11216	-1.002	1.74716
IRAK4	0.952145	-0.179151	0.159803	-1.56835	-0.161402	-1.67627
ITK	-0.0382523	1.56993	-1.55358	-0.592388	-2.13388	-0.320646
ITPA	0.216366	-1.30941	-1.64492	-0.176901	-1.88782	0.340386
ITPK1	-0.448439	1.06339	-0.784391	1.26291	1.55823	1.71169
ITPKA	-0.0838133	1.47937	-1.00755	0.100465	-0.220409	0.0598725
ITPKB	0.0866981	1.70574	0.00265219	2.34882	0.378884	0.460645
ITPKC	1.58286	1.60098	-0.0786579	1.97229	-0.0730594	-1.01624
JAK1	1.58166	1.63126	3.26687	1.65447	2.40342	1.71428
JAK2	-0.429268	-1.35881	-0.58383	0.642546	-1.19101	0.473264
JAK3	1.77486	-0.134912	1.63503	-0.0129126	1.53873	0.612926
KBTBD4	1.9251	0.485792	1.55744	1.80064	0.598662	-0.921877
KDR	1.74277	-0.506252	0.71252	-0.813869	2.70835	0.684131
KHK	-0.7248	-0.679297	0.0157925	-1.09486	0.198937	-0.265062
KIAA1274	0.0244436	-1.7258	0.469258	0.0443354	-0.902024	-1.79153
KIT	-0.559754	1.56288	-0.272611	-0.306448	-0.631174	2.15585
KSR1	0.649194	1.97891	-0.176042	2.38727	-0.155619	0.0395546
KSR2	-0.998308	1.41155	-0.888529	1.83846	-0.337569	-1.6494
LATS1	1.66499	-1.626	0.331043	-0.68348	0.403707	1.0653
LATS2	0.28124	1.78543	0.297891	0.424152	-0.769382	-1.65428
LCK	1.63278	0.0280787	1.99591	-0.371771	1.13287	-0.962319
LHPP	-0.622159	-0.227631	-0.548156	-0.578423	-2.4169	-0.866885
LIMK1	0.396668	-0.0228403	1.20747	0.0723197	-0.142304	-1.33314
LIMK2	-0.140333	-0.354439	-0.610077	0.470806	0.208084	0.118128
LMTK2	-0.00412737	0.644945	0.282048	-0.19639	-0.69437	-1.13234
LMTK3	0.633833	1.43889	0.662791	0.940402	-0.977572	1.30861
LOC390975	0.796651	0.586519	-0.0975405	1.55816	0.612392	-0.172509
LRRK1	0.087043	0.0356129	0.656236	-0.246932	-0.545624	1.38248
LRRK2	0.481745	-0.985936	0.527966	-0.535574	0.976871	0.175997
LTK	0.0855925	0.942208	1.53023	0.578616	0.978759	-0.48782
LYN	1.82178	-0.233626	1.85641	1.54971	-0.341517	0.231994
MAGI1	1.65174	-1.01875	0.37278	0.0487933	1.91209	-1.18495
MAGI3	-0.120359	1.84862	-0.471696	-0.255604	-0.153475	1.80096
MAK	-1.12861	0.0897747	-0.16411	1.52017	-1.31329	-0.377644
MAP2K1	-0.114842	0.398556	0.234584	0.603348	0.362662	0.390539
MAP2K2	-0.320563	0.373946	-1.23878	-0.53299	-0.914526	0.823661
MAP2K3	4.81829	-0.174111	-0.0100308	-0.145012	2.238	-1.83735
MAP2K4	-0.137194	1.94209	1.51368	1.47518	1.80464	1.67555
MAP2K5	0.099152	1.26021	-0.500724	-1.23349	0.633535	1.68638
MAP2K6	0.0618439	1.75853	-0.148315	-0.565888	0.219885	0.60622
MAP2K7	0.0729647	-2.01814	-0.860618	-1.11819	-1.38085	0.484872
MAP3K1	-0.665463	0.210358	0.281231	0.0872128	-0.846695	-0.796004
MAP3K10	1.06452	-1.47983	0.544361	-0.597899	1.02093	-1.01466
MAP3K11	-0.532522	-0.176966	-0.475517	-1.68043	0.571867	-1.85615
MAP3K12	1.14891	1.64883	-1.13931	0.680914	0.376523	-0.358538
MAP3K13	-0.236397	2.17452	-1.10313	1.78024	-0.13025	-0.0933922
MAP3K14	1.67501	-0.153876	-0.209816	-0.557663	2.10141	-0.727296
MAP3K15	-0.0342631	-0.482528	-0.187337	1.1807	-0.163322	-0.405302
MAP3K19	-0.907486	0.862841	-0.408508	-0.0432382	-1.03423	-0.367381
MAP3K2	0.549926	-0.659777	-0.599492	1.94431	-1.54197	-0.449258
MAP3K3	-0.257251	0.971888	-0.793223	0.262233	-0.0890794	0.433352
MAP3K4	1.79412	-0.249612	2.27565	1.01274	3.08905	0.851251
MAP3K5	0.863145	0.643413	1.13396	1.61804	-0.89561	0.139281
MAP3K6	-1.48291	1.32208	-0.354638	0.102951	0.243228	0.168353
MAP3K7	-0.0200939	-0.681463	1.36756	1.84027	0.966159	0.0533875
MAP3K8	0.0925326	-1.68948	-0.331422	1.66314	-0.042669	0.752227
MAP3K9	0.783861	-0.794569	1.41556	-1.43656	-0.080246	0.122805
MAP4K1	-0.786322	1.05942	-0.0206107	-0.171228	0.429429	-0.0153222
MAP4K2	-0.936392	-0.561847	0.323979	1.39126	0.0695098	1.79001
MAP4K3	-1.9133	-0.308171	-1.45265	1.68748	-1.63098	0.0798439
MAP4K4	0.830138	-1.07505	-1.12281	0.35089	-0.673478	1.40848
MAP4K5	-0.342026	1.36926	-0.942574	-0.67353	0.874143	-1.95174
MAPK1	1.80978	0.58148	0.204267	-0.782915	-1.91903	0.146533
MAPK10	0.853809	2.11998	0.110413	-0.434432	-0.525624	1.96318
MAPK11	-0.597279	-0.763665	-2.06851	-0.182491	2.30136	-1.11354
MAPK12	-1.09505	0.900659	-0.123294	0.889224	0.613918	1.21343
MAPK13	1.64262	-1.01227	1.0838	0.420661	-2.85127	0.0957844
MAPK14	0.457342	-0.222666	-0.316891	1.71478	-0.324937	-1.95453
MAPK3	1.81221	-0.938292	-0.180603	-1.35765	-0.110792	-0.144626
MAPK4	-1.76915	0.181598	-3.83597	0.116864	-3.2959	0.839318
MAPK6	-0.698961	-1.51172	1.37145	-1.7728	-1.67031	-0.692995
MAPK7	0.552258	0.228076	0.473889	0.9674	-0.101473	-0.121541
MAPK8	-0.237105	1.10922	1.72378	0.432779	0.601205	0.122895
MAPK9	2.33893	-1.59599	0.25613	-0.671568	1.77445	-1.75443
MAPKAPK2	0.928409	1.7575	-0.478403	1.02488	0.0606107	-0.57182
MAPKAPK3	-2.04801	-0.768467	-0.16568	-0.926335	-1.2032	0.652408
MAPKAPK5	1.56617	0.150166	0.260555	-0.0369618	0.893669	-0.849604
MARK1	0.388165	1.53808	-1.74295	1.52086	0.502688	2.36532
MARK2	-1.71605	-1.08681	-1.54521	-0.939688	0.993846	0.696497
MARK3	0.389537	0.303309	-1.54133	0.416721	-2.31911	-0.503864
MARK4	-1.05298	-0.256008	-1.21301	-1.62262	-0.0983662	-1.78439
MAST1	-1.82024	-0.572514	-2.00226	-0.0764738	-0.37933	0.807199
MAST2	-2.26873	-0.981839	-0.312793	0.189049	2.09676	0.88454
MAST3	0.615894	-1.47873	1.47328	-0.629375	-0.716267	1.80496
MAST4	-0.36025	0.0106624	0.827069	0.104682	-0.0779681	0.0610523
MASTL	-1.67638	0.520679	0.0859246	0.654465	-2.97188	0.233697
MATK	-0.25158	1.70155	0.195111	-0.183124	-1.30147	1.58196
MELK	-1.87956	1.92254	-1.18654	-0.291841	-1.93892	-0.535843
MERTK	1.07037	-1.82173	1.63606	0.191246	1.17452	1.83726
MET	1.88145	0.173415	1.05536	-1.40592	1.87789	-0.491926
MINK1	-0.0681419	-0.0299849	0.250023	0.77186	-0.530691	0.234029
MINPP1	0.585998	-1.70921	-1.53818	-2.00445	0.2305	0.454224
MKNK1	0.136628	0.0639516	1.20285	0.217216	-0.0620421	-0.125453
MKNK2	-1.77978	1.73259	-1.61064	-1.08624	-0.0517673	2.41486
MLK4	0.962376	-1.71474	-0.597361	-1.52787	0.833639	-0.649404
MLKL	0.143839	0.518305	0.830293	1.58001	0.619218	-1.37986
MOK	0.585607	-0.514807	-1.12293	-1.7587	0.219328	-0.802391
MOS	1.40923	-0.474971	1.29025	-0.252839	0.321344	-0.718901
MPP1	0.248497	0.506363	-0.376403	0.171095	0.369006	-0.186679
MPP2	0.381827	-0.323257	0.0718174	1.83655	0.654129	-1.557
MPP3	0.183208	-0.0890139	-0.427968	1.90976	1.86315	1.71585
MST1R	-0.959415	0.717338	1.5557	-1.01948	0.253775	0.0673239
MTM1	-1.39792	-1.79037	-0.549515	1.23125	-0.403237	0.316107
MTMR1	-0.588754	0.21496	1.52275	0.762259	1.55358	1.73168
MTMR2	0.493899	0.879393	-0.55075	1.56601	0.224172	1.93428
MTMR3	1.12881	-0.55455	-2.91749	-1.62922	1.52364	1.55357
MTMR4	2.2491	1.68	0.189271	-0.66173	-1.3735	-0.879216
MTMR6	-1.96763	-0.475033	-1.54007	-0.104323	0.0906905	-0.734889
MTMR7	0.545191	0.436862	-0.704387	1.50136	0.544841	-1.92915
MTMR8	0.800718	0.513555	-0.0168655	0.963849	-0.127962	-1.82761
MTOR	-2.23993	-0.750717	-2.74129	0.205393	0.627657	-0.340473
MUSK	-0.754768	0.222113	-1.14701	-0.536389	-0.734419	0.0539501
MVK	-0.0427255	1.70425	0.0424786	0.00781487	0.631245	-0.163557
MYLK	-2.13452	-1.78231	-1.65787	1.61915	0.783834	-0.103528
MYLK2	-0.488993	-1.47271	-1.04445	-0.302062	1.09048	-0.0695957
MYLK3	-0.134023	0.360934	0.0268403	-0.569642	0.461549	-0.0175597
MYLK4	0.907321	0.505516	-0.252774	-1.30895	0.506731	0.572254
MYO3A	-0.829522	0.500095	-1.39081	-0.650164	-0.14113	1.73509
MYO3B	-1.31717	-1.16862	-1.31862	-0.894019	-1.0825	-0.0877418
NADK	-1.66189	-1.5933	0.500327	1.68779	1.02008	0.181446
NAGK	0.552283	1.28054	0.291768	1.51582	-1.08778	0.00678425
NAGS	-0.21401	-1.80268	-0.0406651	-0.860115	-0.11477	0.572608
NEK1	0.280057	-0.703609	0.161862	1.18085	0.163081	1.94864
NEK10	0.0984783	1.28881	-1.80399	0.922316	1.24991	0.556311
NEK11	0.0759933	1.17231	1.00524	1.50782	0.16683	0.177727
NEK2	0.133835	0.288548	-2.17407	-0.839433	-2.00959	-0.552393
NEK3	0.167941	0.595156	-0.399978	-1.67324	0.0369075	1.87658
NEK4	1.5131	0.77328	2.39194	0.18624	1.75227	0.592945
NEK5	-0.575989	-1.72211	0.561974	1.06785	-0.45501	-1.93051
NEK6	0.32061	0.664109	0.515048	1.35316	-0.356412	0.950543
NEK7	1.26265	0.644641	0.585799	-1.35862	0.0814605	0.0702839
NEK8	-0.06529	-1.36634	-0.361158	-0.804944	1.27956	0.755779
NEK9	-0.569219	0.137416	-0.174158	1.21591	0.608269	-1.15856
NIM1K	0.264513	1.73704	0.175779	0.524757	-0.239946	-0.497641
NLK	0.37303	0.118384	-0.172295	-0.984405	0.196122	-1.61959
NME2	0.379037	0.58649	0.620089	0.685204	0.905758	-0.231795
NME5	0.148833	-1.41928	0.861844	-0.345552	1.30984	1.33556
NME6	-0.137117	-0.951291	-0.266867	-0.240288	1.37576	1.64449
NME7	-0.618992	-0.0229072	-0.118176	-0.619946	-0.250387	-0.596494
NPR1	-0.347986	-0.504584	0.412817	-1.737	-1.2955	-1.70742
NPR2	1.53095	-1.12895	1.52993	-0.177733	1.65546	-1.54493
NRBP1	2.12059	-0.298715	-0.809899	-0.448176	1.7004	-1.30105
NRBP2	-0.120903	-0.994575	0.296375	-0.794512	0.176173	0.583534
NRK	0.178191	-0.372408	-1.96679	-0.229477	-2.18934	0.902557
NTRK1	-0.273049	1.16104	-0.488607	0.504476	-0.00374623	0.908299
NTRK2	0.118356	1.688	-1.35599	1.64442	0.0859838	-0.754464
NTRK3	0.252404	0.812856	0.595266	-1.71214	-1.65179	1.59294
NUAK1	1.4421	-1.5582	0.8236	0.156344	0.0765505	1.7368
NUAK2	-0.00385023	-1.65651	-0.263955	-1.71365	0.705532	0.141189
OCRL	0.195781	0.928767	0.0488628	0.313358	2.34888	0.953536
OXSR1	-2.16208	-0.58444	2.09699	1.82846	1.27428	-0.469706
PAK1	-0.35458	-0.381391	-0.883294	0.0587428	0.738661	1.11014
PAK2	-0.168754	0.699842	0.24485	1.81095	0.87518	-0.466476
PAK3	-0.11312	0.757222	-0.377452	0.441718	-1.71935	1.70389
PAK4	1.34958	1.04451	-0.281331	-0.842268	1.83313	0.420704
PAK6	1.67047	1.56719	-0.476439	-1.17158	1.83552	-1.05768
PAK7	0.107272	0.736224	-0.118538	1.56992	0.753307	1.60469
PANK1	0.892692	1.29089	1.32614	0.0341827	-0.596561	0.736839
PANK2	0.504212	0.726153	0.505101	0.532489	-0.673047	-0.802117
PANK3	-0.124821	-1.63125	1.74769	0.746446	3.03853	-1.79758
PANK4	1.08088	1.58138	-0.105756	0.427557	-0.344844	-1.10232
PASK	1.91049	-1.56703	1.6812	0.148247	0.680202	-1.56011
PBK	1.764	-0.768865	-0.777753	-1.9025	3.91792	0.530006
PDGFRA	-0.0214776	0.98717	-0.123519	0.0438184	0.362011	-1.17042
PDGFRB	0.624793	0.305104	-0.0266786	-0.48359	0.380084	-1.80482
PDGFRL	-0.822948	-0.6644	-0.917614	-0.518927	-0.710044	-0.652198
PDIK1L	1.74323	0.0230275	1.04348	-1.67218	1.87925	-1.10358
PDK1	1.91634	-1.94439	2.1804	-1.67011	0.944495	0.233548
PDK2	1.75803	-1.58426	1.68635	-1.68502	0.0678331	0.0903775
PDK3	1.17969	-0.334079	-1.81381	-1.72301	-0.669159	1.78221
PDK4	0.551048	0.98374	-0.277479	-1.60637	0.243282	-0.442429
PDP2	-4.18825	-1.53199	-1.13225	-0.191414	-1.17343	-1.55668
PDPK1	-3.58273	-2.1474	-1.86815	-0.85221	-0.394389	-0.559999
PDXK	-0.0459923	1.54142	0.686252	1.87019	1.13928	0.207453
PDXP	-0.103726	-0.190038	0.348011	-0.54692	0.274234	0.730594
PEAK1	0.360314	0.517589	-1.02569	-0.779978	1.00114	-0.947771
PFKFB1	-0.969781	2.13855	0.346471	2.10908	-0.759237	1.71043
PFKFB2	-0.651676	1.69772	1.49977	1.65697	-0.145065	-0.588432
PFKFB3	-0.212328	-0.612216	-0.580284	0.0701383	-0.522391	0.350713
PFKFB4	-1.52901	-1.5253	-1.47917	-2.08932	-1.67599	-0.313977
PFKL	-1.59328	-0.58202	-0.646185	0.0303539	0.0698043	0.532823
PFKM	-0.36958	-0.955675	0.608734	1.85047	1.59415	2.25461
PFKP	-1.94362	-1.81913	0.0946993	2.18286	2.06988	1.77288
PGK1	1.83344	-0.411333	-0.332979	0.902537	2.54577	-0.117567
PGK2	-1.09913	1.63256	-0.151253	0.663307	0.0384812	0.940123
PHKA1	0.982609	1.75995	0.279292	-0.417627	0.419288	1.28806
PHKA2	0.821056	-0.839913	-0.92135	0.283328	-1.33944	-1.52215
PHKB	0.87683	0.489835	0.120435	-0.284595	1.34744	0.863735
PHKG1	-0.806232	-0.270838	0.308765	0.280747	-0.454578	-2.02543
PHKG2	-1.43225	-1.74898	-1.06394	0.900106	-0.652094	-0.957523
PHLPP	0.404727	-0.53172	-1.53803	-0.413668	1.537	0.609616
PHLPPL	-0.336349	-0.409282	1.1379	0.893345	-0.542271	-0.957183
PHOSPHO1	-1.00702	-0.159064	-0.570623	-1.74909	1.19357	0.383704
PHPT1	-0.675906	0.51747	1.23605	0.790279	-1.13882	-1.38756
PI4K2A	0.213736	1.04511	-0.336493	0.150828	-0.396394	0.921461
PI4K2B	0.0779095	1.82591	1.77408	1.76073	-1.86693	-0.00108693
PI4KA	-0.137371	1.20379	-0.240512	0.935765	0.806242	0.419929
PI4KB	0.0934961	1.15434	-0.55337	1.04888	0.589549	3.01149
PIB5PA	1.04178	1.57862	1.21875	0.246297	0.370192	1.92743
PIK3C2A	0.419237	-0.562574	-0.191566	-0.0435288	-0.623007	0.489543
PIK3C2B	0.325196	1.38463	1.66417	0.57175	-2.5523	-2.18909
PIK3C2G	0.695572	0.746224	1.03734	1.97801	-0.149934	2.04509
PIK3C3	-2.07702	-0.0908243	0.602918	0.0188858	-3.02208	-0.798545
PIK3CA	-0.642042	0.505579	0.187014	-1.40618	-0.00501178	-1.04796
PIK3CB	1.91299	1.49883	-0.0356359	-1.14792	0.609614	0.930003
PIK3CD	-0.0422886	-1.17742	-0.292775	0.532919	0.198747	2.17194
PIK3CG	0.94199	0.733401	-0.468533	-1.69966	-0.922867	-1.25974
PIK3R4	-0.419489	-1.62825	-1.93621	-0.36265	-1.69781	1.04395
PIKFYVE	1.21534	1.55319	0.51182	0.462984	0.404723	0.00474488
PIM1	0.474968	0.440217	0.416836	2.02777	-0.5697	0.925091
PIM2	0.0590222	-0.804185	-1.07302	0.0762382	-0.14338	-0.680828
PIM3	0.57349	0.647956	-0.539464	0.209604	-0.912841	-0.181992
PINK1	0.187341	2.10429	-1.41521	0.249624	-1.57953	0.37399
PIP4K2A	0.258353	1.54319	-0.470714	0.647439	0.685689	1.48412
PIP4K2B	1.41126	1.66388	-0.470256	-1.32591	-0.981152	1.28441
PIP4K2C	0.0809456	0.500208	-0.201603	-1.25499	0.305877	1.60273
PIP5K1B	0.592642	-0.309262	0.306436	1.03392	1.23682	0.446479
PIP5K1C	0.240003	-0.339096	-2.18246	-1.08238	0.723093	1.02952
PIP5KL1	-0.460539	-1.01101	-0.0141597	-1.08831	0.420513	-0.798483
PKDCC	3.46025	0.101072	-1.70382	0.117914	0.272528	1.78171
PKLR	0.507368	1.61394	0.501363	1.5714	-0.150703	0.408111
PKM	2.09481	1.00263	-0.342307	-0.0711665	-2.73851	-1.29036
PKMYT1	-0.205403	0.421623	-0.759325	0.325266	0.599893	1.59331
PKN1	0.40863	-0.627801	0.401467	0.835766	0.102142	0.287499
PKN2	0.0314238	-0.285249	-0.49814	-1.81915	0.0181061	1.82391
PKN3	2.17271	1.15246	0.680619	0.155358	4.3332	1.27037
PLK1	1.89447	2.03745	1.0259	-1.33877	0.627269	1.65398
PLK2	-0.132771	-0.209972	-1.53996	0.0220605	0.627739	-1.55485
PLK3	-0.977971	-1.0811	-1.76415	0.406475	-1.73579	-1.10016
PLK4	-0.87632	-0.129457	-0.26987	1.29124	0.0378476	1.04541
PME	-0.394574	0.000536797	-1.60694	-1.0793	-1.05533	-1.27198
PMVK	1.79869	0.439012	-0.472149	0.422197	0.0758389	-0.268629
PNKP	-0.745705	1.57491	1.26492	1.55331	0.365325	-0.326963
POMK	0.419391	-0.109153	0.042492	-0.459117	-0.435969	-1.37395
PPAP2A	0.0877158	1.86721	0.744651	1.13164	-0.208476	-1.11536
PPAP2B	-0.398282	-0.449394	0.655578	0.259617	0.541961	-0.438746
PPAP2C	-0.402462	-0.295645	-0.308842	-0.779112	1.37427	0.847901
PPEF1	0.994469	1.12646	-0.579415	-0.0685396	0.149241	1.66671
PPEF2	0.764139	0.22713	1.56087	1.03481	1.5862	0.609383
PPFIA1	-2.08283	-0.524999	-2.45157	-2.73524	-1.22189	-2.74295
PPFIA2	-0.0405285	-0.114087	-1.89647	-3.08317	0.782996	0.201947
PPFIA3	-0.832347	-0.211342	-0.494821	-0.526573	-0.147775	0.350627
PPFIA4	-0.300425	-1.02498	1.9362	1.21525	0.884348	0.210563
PPM1A	-1.82537	-0.452127	0.266597	-0.619269	-0.0136713	0.858691
PPM1B	1.84766	0.284524	0.080477	-0.324221	1.85229	-0.437331
PPM1D	-1.91503	0.0456417	0.313688	-0.868374	-1.55665	0.536306
PPM1E	0.20463	-0.620933	-0.358124	-1.64534	-0.873545	-0.93956
PPM1F	-0.398495	-0.24407	-1.41349	-1.136	0.253991	0.225381
PPM1G	1.83015	-0.726323	0.502862	1.14847	1.55795	1.58768
PPM1K	-0.525426	0.962803	-0.527537	0.00238508	1.85089	1.65049
PPM1L	0.571622	1.581	0.305477	1.51531	0.0467224	0.0542573
PPM1M	0.109812	0.583616	1.10037	0.473473	0.0842569	-0.185461
PPM2C	-1.05812	-0.619609	0.609057	-0.568237	-1.34927	-0.987432
PPP1CB	0.356069	1.63917	-1.60737	-1.68013	1.74831	1.15096
PPP1CC	-0.531306	0.569719	-1.32373	-0.960432	-0.51553	-0.86835
PPP1R10	-2.10069	-1.84638	0.16924	1.93045	-0.435767	3.64414
PPP1R11	0.588717	0.487261	0.138844	-0.21762	-0.344267	-1.23285
PPP1R12A	1.2751	0.560034	-0.618953	-0.560867	1.14633	0.0795496
PPP1R12B	-0.250614	-0.928664	0.258208	0.937673	0.282935	0.0906494
PPP1R12C	0.288439	0.319903	-2.2096	-0.982727	-0.45692	-0.661059
PPP1R13B	0.360819	1.52729	1.53615	-0.552606	0.810368	0.393288
PPP1R14A	0.51641	-2.04489	0.633926	0.642728	-1.68128	-0.904854
PPP1R14B	1.2235	1.46995	-0.781086	-1.3462	-1.4171	-0.572874
PPP1R14C	2.15005	1.75989	-0.635033	-3.06976	-0.233005	0.758867
PPP1R14D	-0.0780624	-0.0408152	0.00622776	0.740134	-0.082999	0.312656
PPP1R15A	0.111049	-0.0184036	-0.41508	0.173362	-1.48219	0.0510772
PPP1R15B	-3.54435	-3.10429	0.333152	0.223684	-1.80197	-1.774
PPP1R16A	-1.38402	-1.83266	-0.0543573	-0.37166	-0.612144	-1.92197
PPP1R16B	0.815315	1.23583	-1.74445	1.05137	-2.28994	-1.28336
PPP1R1A	0.335424	-0.834839	1.02874	-0.23843	-0.38638	-0.04827
PPP1R1B	0.100721	-0.538807	0.171484	-0.441945	1.28112	0.974096
PPP1R1C	-3.62557	-1.75345	0.702777	-0.365549	0.557992	-0.255939
PPP1R2	0.133214	-0.146432	1.29647	0.242779	-0.514448	-0.426359
PPP1R3A	0.312921	0.457046	0.195095	0.909192	-0.81042	-0.406019
PPP1R3B	-1.69353	0.402152	0.185663	-0.682882	-1.84279	-0.857654
PPP1R3C	0.617695	1.14674	-2.93509	-1.5591	-0.387122	-0.369955
PPP1R3D	0.165448	1.75937	0.856622	2.07899	0.164233	0.203997
PPP1R7	-2.85109	-0.216666	-0.699322	-0.300059	0.65705	0.623983
PPP1R8	-0.532293	-1.86887	0.526278	0.0683548	-0.547065	-0.0824574
PPP1R9A	-0.559405	-1.9242	-0.391784	0.72629	-1.12628	-2.58797
PPP1R9B	-0.401145	-0.714458	-0.620314	0.130266	-1.3092	-0.335475
PPP2CA	0.651941	1.00382	-0.34361	-1.26858	3.01494	1.82646
PPP2CB	1.89353	1.59927	0.19203	1.62203	1.83172	0.761242
PPP2R1A	0.417352	-1.98884	-1.01732	-0.98755	0.933619	-1.43789
PPP2R1B	0.271286	-0.191657	-0.646362	-1.69962	0.930309	-0.368553
PPP2R2A	1.60717	1.7698	0.00964844	-0.163402	0.748771	1.42495
PPP2R2B	-0.117995	-0.571745	-0.657511	0.129996	-0.0899955	0.017118
PPP2R2C	0.0899274	1.58613	2.23425	1.58089	-0.190014	0.00325616
PPP2R2D	0.397494	0.0178134	0.506091	0.0229651	-0.400237	-1.1139
PPP2R3A	0.268454	-1.06587	1.99516	1.41859	-1.09813	-0.293603
PPP2R3B	-1.12526	1.50645	-0.036974	-0.877318	1.50249	2.30173
PPP2R4	0.978351	1.58119	-0.176725	1.73884	-1.00418	0.0114509
PPP2R5A	1.32002	1.17472	1.64172	0.765825	-1.66531	0.421842
PPP2R5B	-0.204933	0.274918	1.39325	0.436297	0.525908	-0.0933004
PPP2R5C	-0.235174	-0.803313	1.57445	-0.141291	1.69871	-0.713821
PPP2R5D	0.756881	-1.85273	-0.701994	0.173241	1.21404	0.295073
PPP2R5E	-1.28031	-2.14356	0.359762	0.414104	0.349232	-0.394364
PPP3CA	0.143915	-1.18521	-1.58867	-0.954019	-1.7438	-0.056279
PPP3CB	-0.996447	-0.278325	0.280175	0.137963	0.980996	1.77753
PPP3CC	1.76066	0.175372	0.719153	-0.275601	1.06724	1.76626
PPP3R1	-0.452979	0.166087	1.82145	0.79877	1.61469	0.442826
PPP4C	-0.176565	1.44144	-0.377841	1.36613	-0.860685	-0.446922
PPP4R1	0.352375	1.67151	1.15312	0.841666	-0.470311	-1.10215
PPP4R1L	-1.73853	-2.02197	-0.54603	1.05371	-0.150234	0.116527
PPP5C	-0.117952	-0.532613	-0.538275	-1.75782	-0.190337	0.534191
PPP6C	0.574886	0.245045	1.59868	1.54663	-2.00962	-1.10928
PRKAA1	1.50388	-1.7472	0.53686	-1.33438	1.61612	-1.77857
PRKAA2	-0.905465	-0.516462	0.169984	0.884874	-0.888203	-0.399963
PRKACA	0.206656	1.87463	-1.64151	0.433468	1.08955	0.441083
PRKACB	-0.42611	-1.10126	-0.366984	0.381569	-0.0281748	0.0445374
PRKACG	-0.397249	0.0337004	-0.356065	-0.00928484	-1.91354	-1.27599
PRKCA	-0.967606	0.902613	2.26408	-1.09164	1.90808	0.640649
PRKCB	2.60327	0.186904	0.413611	-0.206837	1.6009	-0.712945
PRKCD	-0.0591078	-0.322747	-1.07779	0.109791	0.175738	0.788202
PRKCE	-0.603862	-2.04488	-0.251844	0.25326	-0.380999	-0.178716
PRKCG	-0.758384	0.223245	-1.12116	-0.561929	-0.0680542	-0.11301
PRKCH	0.78672	1.98757	0.176358	1.74511	-0.576086	0.72646
PRKCI	-0.249914	-1.06553	1.5653	0.563399	1.12544	-0.638312
PRKCQ	-0.460728	-1.93135	-0.528416	0.63157	-1.31548	0.43976
PRKCZ	-0.643164	1.31005	-0.458942	-0.186032	-0.558778	1.43173
PRKD1	1.3929	0.971963	-0.758821	-1.51151	0.501157	1.07908
PRKD2	-0.114806	0.914042	-1.57384	0.982362	-1.65883	0.0962802
PRKD3	1.72469	1.43773	-0.202468	-0.896998	-2.4215	-0.981138
PRKDC	-0.473169	-1.66606	-1.13687	0.968328	0.778272	-0.417387
PRKG1	-1.84341	-0.771693	0.553778	-1.73128	1.56684	-0.519999
PRKG2	-0.200779	1.03326	-0.441171	-0.331724	0.72418	-0.755055
PRKX	0.212028	1.83285	0.740282	1.64425	0.206013	-1.70791
PRKY	0.261309	0.119503	0.835371	0.489098	0.597603	0.653747
PRPF4B	1.22809	2.33287	-0.251959	-0.641278	2.06494	-0.198573
PRPS1	0.387897	0.35842	-0.550856	1.57662	-1.63438	0.314975
PRPS2	-1.92356	-1.35859	-0.773682	-0.402532	1.90286	1.28625
PSKH1	-1.03408	-0.790364	0.96964	-0.230081	1.7852	-1.65673
PSKH2	1.907	1.56682	1.77791	-1.29664	-0.0970909	-0.127133
PSPH	-0.69483	-0.21002	0.0516637	1.53655	-1.26889	1.56451
PTEN	-0.768048	0.131708	-1.83344	-0.590504	0.877191	-0.0763492
PTK2	-0.2509	-0.084141	-0.211388	1.28513	-0.944358	-0.0305337
PTK2B	-1.15696	0.618075	-1.40916	-1.24282	-0.649303	0.46955
PTK6	0.497786	-0.19533	-0.0232081	0.617757	0.342971	1.5155
PTK7	-0.311915	-0.441364	-1.47533	-0.692618	-1.6394	-0.0353361
PTP4A1	-0.398964	-1.97472	0.0578866	1.43605	0.585888	0.10099
PTP4A2	-1.74414	-1.69028	-1.89484	-1.24552	-0.094327	-0.238575
PTP4A3	1.18018	0.832856	-1.15639	-0.717143	0.604441	0.746783
PTPDC1	0.426214	-0.219012	-0.801392	-0.800433	0.292256	-0.123391
PTPLA	-0.694036	-0.402298	-0.619177	1.73845	0.923776	-1.25884
PTPMT1	0.383165	0.300137	0.899545	2.12944	0.955006	0.0389427
PTPN1	0.788526	-0.353081	-0.794588	-0.155152	0.656829	1.5936
PTPN11	-0.932903	-0.971042	-4.44649	-1.37321	1.16195	-0.0747381
PTPN12	0.766231	1.4947	-0.146118	1.03997	-1.03906	0.118065
PTPN13	-1.29964	1.51759	0.494749	1.54849	-0.913869	-1.0489
PTPN14	-1.05443	-0.0193666	-0.218992	-0.317121	1.60936	0.162437
PTPN18	0.234422	-0.032699	0.647196	-0.593706	-2.02526	-0.625424
PTPN2	-0.0360462	0.0392	-0.522359	-0.309273	0.566612	-0.521163
PTPN20	1.68523	0.527791	0.769684	0.84381	-1.17203	-1.57245
PTPN21	-0.356947	0.522526	-0.284443	0.0580734	-1.58405	-1.31168
PTPN22	0.475166	1.51544	-0.192957	-0.0452424	0.559757	1.60642
PTPN23	-1.00647	1.56197	-0.692462	0.566122	-1.51432	1.64737
PTPN3	-1.88124	-0.612841	-1.54667	0.197849	0.175672	1.03518
PTPN4	0.669777	1.11437	-0.00346972	-1.4573	0.245498	0.631938
PTPN5	-0.0687376	-0.273117	-1.88832	-1.56104	0.391262	1.6523
PTPN6	1.21875	1.71834	-0.640954	-0.241261	0.406029	0.0959358
PTPN7	-1.58752	1.50796	-1.31043	-0.401879	-1.68499	-0.922901
PTPN9	-0.522132	-1.57358	-0.019228	1.51196	-0.432111	-0.203075
PTPNS1	0.4864	1.14766	-0.386365	-0.204231	-1.30593	-0.61023
PTPNS1L2	0.306447	-0.168531	-1.17815	0.0904426	2.19963	0.368017
PTPNS1L3	0.116982	-0.14733	2.26314	0.933343	-0.843912	-1.51832
PTPRA	-0.863591	-0.825304	0.167038	1.55911	-0.915785	0.335945
PTPRB	0.21009	0.0838064	-0.726464	-0.642739	-0.0778923	-0.983673
PTPRC	0.356338	-0.15979	0.0103318	-0.539103	-0.818486	0.272035
PTPRCAP	-0.0147184	0.227333	-0.729678	-1.45627	-1.18793	-0.545843
PTPRD	-1.07711	-0.845729	0.193901	0.398008	-1.66899	-0.272502
PTPRE	-0.209445	-1.63231	-1.73973	0.209705	0.099957	1.52582
PTPRF	0.547445	1.61695	-0.50401	1.52521	0.131872	0.171028
PTPRG	2.40284	1.9787	-0.126135	-0.389594	-1.22677	1.67495
PTPRH	-0.308052	1.67494	-1.69385	-0.846822	0.555906	1.52505
PTPRJ	2.16345	0.552926	-0.0701614	-1.56932	-1.52131	1.18996
PTPRK	-1.96791	-0.0298242	1.27293	1.5132	1.88231	1.51901
PTPRM	0.30465	1.56795	-1.17084	-0.0190702	-0.180531	1.58069
PTPRN	-0.758445	-0.0267149	-1.15248	-1.56999	-0.0601426	0.243586
PTPRN2	-0.990905	-0.37615	-1.5258	-0.417582	-2.14584	-1.40096
PTPRO	0.214842	0.155518	1.44012	-0.657746	1.47171	2.03495
PTPRQ	0.887459	0.432743	-2.52811	-1.18226	1.5116	0.579681
PTPRR	-0.224028	-0.162682	-0.50866	-1.29317	-2.1739	-0.735513
PTPRS	0.478794	-1.65863	-0.185518	1.60134	0.342387	0.0384495
PTPRT	-0.987936	0.231508	-1.80479	-1.56478	-1.38509	-0.180119
PTPRU	0.72424	1.55384	1.24944	-0.379426	0.469377	-0.303402
PTPRZ1	-0.191419	1.5443	0.254058	-0.00243398	-1.36765	-1.59078
PXK	-0.671042	-0.0834443	-1.04389	1.74227	0.896077	-0.717089
RAF1	0.5834	-1.31408	1.65007	2.14279	-1.57095	-0.506235
RBKS	0.895251	1.75398	1.06898	-0.120994	0.872423	-1.64732
RET	-0.452739	0.745936	1.10963	-1.86657	-1.55464	0.0929079
RFK	-0.72425	-1.95267	0.0134964	0.151575	0.353807	1.75044
RIOK1	-1.09719	-1.97355	-0.339276	-1.6006	-0.239485	-0.0539966
RIOK2	-3.38462	-0.356806	-3.60266	0.76148	-1.0698	-0.659948
RIOK3	1.49867	1.634	0.0996381	0.145698	0.730599	1.76784
RIPK1	1.83947	0.389509	0.381153	-0.230728	-1.74679	-0.990888
RIPK2	-0.411514	0.0867491	-0.791858	0.925998	-1.99361	0.461082
RIPK3	0.254678	-0.805657	0.208349	1.80511	-0.673639	1.49885
RIPK4	1.31736	-0.615305	1.13691	-1.40081	0.835217	0.49269
RNASEL	-0.991779	-0.194267	-1.36876	-0.664985	-1.89129	-0.499622
RNGTT	0.483305	1.55506	-0.75926	1.56301	0.492143	-0.131798
ROCK1	0.473834	0.147092	0.580727	0.431977	0.228425	1.69018
ROCK2	-0.818489	-1.69275	-0.174148	-1.56778	-1.35828	0.472303
ROR1	-1.63258	-0.874834	0.516602	-0.757078	2.02385	-1.84589
ROR2	-1.65065	0.584459	-1.69161	0.460421	0.131355	-0.730656
ROS1	-0.460353	0.0568589	0.199392	-0.435306	0.456674	0.998965
RPS6KA1	0.0595505	0.0759656	0.791581	-0.298477	-0.34153	-0.855583
RPS6KA2	-0.156681	-0.142589	-1.58433	-1.02267	-1.41957	0.017208
RPS6KA3	2.43505	1.92714	-1.51258	0.192291	-0.387708	1.5924
RPS6KA4	-0.167687	-1.66942	0.104222	-1.57578	-0.299484	-0.533622
RPS6KA5	-0.212475	0.664169	-1.14921	-0.308442	0.210227	0.298788
RPS6KA6	0.729468	1.73469	-1.65046	1.87981	-1.59792	0.760292
RPS6KB1	-3.42852	-1.70531	-4.0823	-1.71653	-2.21769	0.225624
RPS6KB2	0.25467	0.418548	0.900828	-1.58187	1.29633	-1.77928
RPS6KC1	1.19927	1.77946	0.421552	1.21975	-0.6956	-0.9097
RPS6KL1	-1.46966	-0.0739677	-1.36639	1.59149	-0.331071	0.448867
RYK	0.503736	0.00489776	0.679729	1.52491	0.904552	1.61293
SBF1	0.175254	1.52159	0.770669	0.0460491	0.623586	1.5584
SBF2	-0.456919	1.63194	-0.455838	0.143403	-0.231087	-1.56307
SBK1	0.463482	-0.781728	0.782579	0.0603344	0.55042	0.163028
SCYL1	-1.78852	1.90856	-1.26964	-0.233013	-1.71034	-0.715449
SCYL2	0.98908	-0.523023	0.619137	-0.384511	-0.67463	-0.410402
SCYL3	0.560277	0.681378	0.025597	0.488097	0.380677	0.54498
SEPHS2	0.215212	0.0319521	0.875184	0.679858	0.8693	1.99249
SGK1	-0.0179337	-0.971149	-0.256032	0.22158	1.52506	1.8073
SGK2	-0.154366	-0.0454638	0.546495	-0.832596	-1.32699	0.81157
SGK223	0.569694	-1.70549	0.206946	-1.61073	0.693442	-0.425343
SGK3	1.6078	0.788739	-0.300924	0.362474	1.86124	1.86025
SGK494	0.620661	-0.974875	-0.429215	-1.62861	-0.247882	1.66672
SGPP1	1.48057	1.50814	0.289292	0.698805	-0.460787	1.54903
SIK1	-1.83982	-1.815	-0.928802	-1.73882	-2.16631	-0.621239
SIK2	1.13943	1.16223	-2.62088	-2.92976	-1.7569	-0.169611
SIK3	-0.493113	-0.141432	-0.277021	0.319804	0.668883	0.322741
SKAP1	-0.157729	1.76603	0.605406	-0.237098	1.46852	1.22478
SKAP2	1.2535	1.7413	0.237276	1.55641	1.02122	-1.27303
SKIP	-1.11351	-0.733132	-0.427884	0.541081	-0.996713	0.0785314
SLK	0.974955	1.2216	-0.801707	0.132464	0.698522	1.40254
SMG1	2.79374	-0.242451	0.685046	1.88215	0.492141	0.494207
SNRK	-0.378985	0.542707	-0.0878769	1.31138	0.289892	-0.423703
SPEG	0.29486	-1.70644	0.812845	1.13162	-1.27698	2.27754
SPHK1	-0.658822	-0.604586	-0.490237	0.466841	0.691226	1.94289
SPHK2	2.37425	1.87918	-1.28962	-0.839973	0.5287	1.05548
SRC	0.278473	0.5702	-2.27277	0.994136	-1.68448	1.60031
SRMS	0.698196	0.722128	0.897976	0.289348	1.98588	-0.610956
SRPK1	0.0304577	-1.13582	1.64676	0.0826428	-1.78368	1.06127
SRPK2	3.81378	1.65677	1.94023	-1.71686	-0.417504	-0.0378427
SRPK3	0.590444	0.995014	-0.67162	-0.644201	0.781853	-0.403814
STK10	-0.747852	0.110618	-0.37084	0.548793	-0.659184	-0.176571
STK11	-2.60201	-2.32813	-1.75432	-1.05915	-0.501971	-1.75381
STK16	0.965795	0.490059	-0.0196138	-0.539079	-1.30113	0.3024
STK17A	0.00290682	1.64989	-0.154581	1.02351	1.6014	1.71608
STK17B	-0.533438	-1.55779	-0.386787	0.479432	-0.0133503	0.638232
STK19	0.41245	-0.86321	0.675115	0.417426	0.603927	-0.603332
STK24	0.0591101	1.38281	-0.607448	-0.0467375	0.100664	1.13015
STK25	1.6499	0.897383	-0.358543	-0.14579	-1.5275	1.12743
STK26	-0.495126	1.81871	-0.436801	-0.258565	0.98324	0.156591
STK3	0.109492	1.40825	-0.861301	-0.379206	0.145303	1.37839
STK31	-0.0457857	1.65495	-0.604838	-1.58524	-0.201721	-0.312088
STK32A	-0.679404	0.0838139	0.150635	1.65034	0.160693	-0.741822
STK32B	0.430923	-1.72648	0.763145	1.11042	0.903549	0.493787
STK32C	0.350807	-0.550516	0.0993527	-0.500093	1.17217	1.83126
STK33	-1.7703	0.310503	0.563655	1.19109	-2.03348	-0.739462
STK35	-1.8958	-0.516	-0.614413	0.537126	-1.74974	-1.26352
STK36	1.67985	-0.226113	-1.85475	-1.39548	0.361768	1.55887
STK38	0.206491	0.964298	-0.278563	1.34902	-0.505494	0.846459
STK38L	-0.548628	-0.400816	-0.263756	0.52709	0.618071	1.57989
STK39	1.19169	-0.0235534	0.742634	0.977011	0.24713	0.340129
STK4	-0.741653	1.04929	-0.282011	0.599187	0.287304	0.153263
STK40	-0.47839	0.319299	-1.65666	-0.343379	-0.0565058	-0.923806
STKLD1	-0.161917	-0.989453	-0.480614	0.28638	-1.64748	-0.227395
STRADA	1.94982	1.61868	0.669871	-1.0415	-0.889751	-1.50491
STRADB	-0.119461	-1.57897	0.358144	0.231574	-0.431963	0.44739
STYK1	-0.522445	-0.285152	0.816275	0.439033	-0.0615606	1.14297
STYX	1.61968	0.0889483	1.62649	1.58774	1.02271	1.68046
SYK	0.187409	0.817604	-0.0202481	-0.575715	-0.69816	1.33708
SYNJ1	0.231968	-0.0518956	1.53742	0.974323	-2.3314	-1.40678
SYNJ2	-2.14844	-1.61828	-2.14096	-0.599853	-1.17853	-1.06185
TA	-1.22467	-0.914278	-0.304685	0.28325	-1.68527	-1.32757
TAF1	0.019378	-1.06688	-0.34338	0.411007	-0.105821	-0.0591699
TAOK1	-1.86475	1.72686	-0.76748	0.328644	-2.17448	-1.77979
TAOK2	1.51063	0.197405	1.04484	-0.114109	1.46276	-1.53224
TAOK3	-0.847497	-1.76169	0.301682	0.385727	1.40109	1.16102
TBCK	0.108451	1.5467	0.291664	-0.590795	-0.489119	0.0839113
TBK1	3.42481	1.85427	1.24643	0.271691	-2.51107	-1.76309
TEC	-0.288946	-0.444165	0.0450496	-0.756878	-0.0581063	-0.188735
TEK	1.5765	1.16099	1.72316	0.453128	0.730383	-0.314199
TEN1-CDK3	1.23558	-0.197515	0.9035	1.74774	1.24333	1.77677
TENC1	-0.769353	0.168937	-0.135716	0.0988714	0.901141	0.0280419
TESK1	0.533026	0.596972	-0.998629	1.56336	-1.03124	0.407047
TESK2	0.673369	-0.0409626	-1.2524	-0.793632	0.416508	0.0358437
TEX14	-1.29316	1.67664	-2.53249	1.81434	-2.02185	0.0530456
TGFBR1	-0.532304	1.89986	0.117247	1.40568	0.646789	1.04611
TGFBR2	1.78247	0.51365	1.22687	-0.0220089	2.46643	0.175142
TIE1	-0.820339	-0.677056	-1.50777	-0.150332	0.765205	0.94015
TJP2	0.797736	0.770319	0.774521	-0.97847	0.177313	-0.761336
TK2	0.78657	1.34124	1.36954	0.625155	1.51889	-1.82057
TLK1	0.591298	1.70324	0.205148	0.86566	-0.441344	-0.137037
TLK2	-1.44903	-1.25347	-0.851607	1.98227	-0.109893	1.92681
TNIK	-0.22469	1.64825	0.29606	-0.107693	0.855714	-0.999312
TNK1	1.08037	0.15963	0.416137	-1.80983	0.0351583	0.321463
TNK2	0.968778	-0.0859593	0.423416	-0.989843	1.85419	-1.79448
TNNI3K	-0.666729	-0.0762072	-1.83879	0.717732	-2.08977	0.374245
TP53RK	0.329508	0.469906	-0.632293	-1.76089	0.470025	-0.752566
TPK1	0.178589	1.74153	-1.29394	0.358049	-0.167814	1.65016
TPTE	2.35448	0.166299	1.32477	1.42221	-0.8084	-0.748919
TPTE2	0.489124	0.0107868	-1.10521	-0.730727	-1.03257	-0.685107
TRAD	-0.410224	0.249429	0.188885	-0.744913	-0.450508	-0.208516
TRIB1	1.5826	-1.4277	1.76017	-0.418603	1.8876	0.845638
TRIB2	1.85689	1.87565	3.19176	2.49099	-0.0712973	-0.179932
TRIB3	-1.03326	0.752885	-0.931624	-0.430651	0.644561	-1.61055
TRIM27	2.23333	0.572526	-1.60837	-1.75723	0.22644	1.72196
TRIM28	-1.95118	-1.74672	1.2024	-1.61627	-1.56547	-2.49165
TRIM33	-0.157822	-0.178032	-0.242487	1.87307	1.09899	1.57124
TRIO	-1.56643	0.563941	-1.56634	1.34113	-0.838336	-0.982844
TRPM6	-1.35372	0.569752	-1.06054	0.0975683	0.140287	0.0979458
TRPM7	-0.0453273	-0.0379559	-0.996548	-1.59613	-1.01188	0.76018
TRRAP	-1.68505	0.70004	-0.822878	0.46714	-2.08451	-1.12905
TSSK2	-0.276809	1.73633	-1.9733	-1.40278	-1.71187	-1.90437
TSSK3	-0.0510011	1.74575	-0.740094	-0.319201	0.367664	1.41924
TSSK4	1.56969	-0.162163	0.263485	-1.02116	2.63077	0.247559
TSSK6	0.787203	0.554393	0.577805	1.77853	0.404916	-1.30357
TTBK1	1.04621	0.905389	-0.0458792	-0.701672	0.241087	0.349248
TTBK2	0.47032	-1.17277	0.148045	-0.291525	0.823547	-0.946105
TTK	-1.74624	1.05132	-2.07414	0.751859	-0.0803292	0.261338
TTN	0.00763817	-1.66523	0.396223	-0.0254041	0.696439	-1.56945
TWF1	-1.7878	1.8204	-1.73295	1.6084	-1.17268	-1.00309
TWF2	-0.075886	0.153202	-0.307056	1.92236	0.85342	-1.42531
TXK	1.61767	-0.745458	1.88426	0.563975	-0.73462	-0.448419
TYK2	0.646614	-1.63056	1.05885	-1.64151	0.0416417	-0.00167666
TYRO3	0.486956	-1.68814	1.18223	-0.213526	-0.692156	-1.56798
UCK1	1.65432	1.57273	0.461017	2.00377	1.70003	-0.343782
UCK2	-0.592552	1.98367	0.435977	1.73238	1.10804	-0.116665
UCKL1	-0.0797975	0.0447676	-0.212302	1.07712	-0.137976	0.377807
UHMK1	-0.605859	1.60549	-0.270493	-0.250152	-1.17589	-1.55185
ULK1	0.522924	1.90425	1.25047	1.61864	1.32204	1.48794
ULK2	1.6753	0.288222	0.481336	-1.15509	1.83783	1.67285
ULK3	1.03771	-0.682085	-1.15052	-1.26296	0.513295	-0.97423
ULK4	1.73051	1.2152	-0.653156	-1.23123	1.78277	0.384444
VRK1	-0.426383	1.53878	-0.697728	-1.76505	-0.849762	1.66051
VRK2	-0.199199	-0.411819	0.295642	0.204993	0.998994	1.274
VRK3	-0.078035	-1.37819	0.609798	-0.493365	1.84323	1.36926
WEE1	-0.986214	-2.024	-0.238341	-0.0424711	-0.517963	-1.58243
WNK1	-1.58834	0.0200227	-0.017896	0.54789	-1.73678	0.0346784
WNK2	-0.734727	-0.752086	-1.27116	-0.570473	0.446571	-0.0726832
WNK3	-0.317528	0.0647885	-0.00369024	0.139208	-0.326512	-1.16203
WNK4	0.367504	-0.485094	-0.650997	0.786434	-0.347833	-0.914323
XYLB	0.701316	0.297851	2.05523	1.20566	1.74481	0.240762
YES1	1.84815	0.483192	0.13202	-0.99104	2.33803	1.83048
ZAK	0.341478	0.431052	0.512276	-0.0130899	0.370887	0.226168
ZAP70	1.44245	1.16585	0.4964	-1.34603	-0.302491	0.586903
