# Supplementary material for: TRIM28 regulates the nuclear accumulation and toxicity of both alpha-synuclein and tau
Source: eLife. 2016 Oct 25;5:e19809. doi: 10.7554/eLife.19809 (PMC5104516; doi:10.7554/eLife.19809)
Supplement: Supplementary file 1. — Statistical summary of each figure, including comparisons between each group. Figure in question is in column A. Assay and quantitative measurement from that figure are in columns B and C. Statistical test employed and sample size (n) are in D and E. Statistical comparison is in F. F values, t values (when applicable) and degrees of freedom are present in column G. Calculated p value is presented in column H. DOI: http://dx.doi.org/10.7554/eLife.19809.024 [file elife-19809-supp1.xlsx]

## Sheet: Statistical Summary of Results
Figure	Assay	Measurement	Statistical Test	n	Comparison	F (DFn, DFd)	P (or R value when specified)
Fig. 1A	Ratiometric Screen Comparison	Screen Overlap	Hypergeometric test		DsRed_IRES_α-Syn:GFP hits vs. DsRed_IRES_tau:GFP hits		0.00095
Fig. 1B	Flow Cytometry	Change in EGFP/DsRed Ratio - α-Syn (Red)	One way ANOVA	3,3,3	See Extended Data Fig. 2 stats
Fig. 1C	Western Blot - HEK293T cells	α-Syn levels	One-Way ANOVA	7,6,7,7,4	shRNA treatment	F (4, 26) = 15.07	<0.0001
			Holm-Sidak Post-Hoc test		shScram vs. shTRIM28-1		0.4821
					shScram vs. shTRIM28-2		0.0035
					shScram vs. shSNCA		< 0.0001
					shScram vs. shMAPT		0.2123
		tau levels	One-Way ANOVA	7,6,7,7,4	shRNA treatment	F (4, 26) = 36.54	<0.0001
			Holm-Sidak Post-Hoc test		shScram vs. shTRIM28-1		0.0249
					shScram vs. shTRIM28-2		0.0091
					shScram vs. shSNCA		0.63
					shScram vs. shMAPT		< 0.0001
	Western Blot - Mouse Primary Neurons	α-Syn levels	One-Way ANOVA	3,3,3,3	shRNA treatment	F (3, 8) = 18.05	0.0006
			Holm-Sidak Post-Hoc test		shScram vs. shTrim28-1		0.0013
					shScram vs. shTrim28-2		0.0027
					shScram vs. shTrim28-3		0.0003
		tau levels	One-Way ANOVA	3,3,3,3	shRNA treatment	F (3, 8) = 14.04	0.0015
			Holm-Sidak Post-Hoc test		shScram vs. shTrim28-1		0.0028
					shScram vs. shTrim28-2		0.0025
					shScram vs. shTrim28-3		0.0009
	Western Blot -	α-Syn levels	Student's t-test (two-tailed)	8,11	shScram vs. shTrim28	t=2.790 df=17	0.0126
	Mouse Hippocampus (shRNA)	tau levels	Student's t-test (two-tailed)	8,11	shScram vs. shTrim28	t=2.470 df=17	0.0244
	Western Blot -	α-Syn levels	Student's t-test (two-tailed)	13, 9	WT vs. Trim28+/-	t=3.295 df=20	0.0036
	Mouse Hippocampus (Trim28+/-)	tau levels	Student's t-test (two-tailed)	13, 9	WT vs. Trim28+/-	t=2.335 df=20	0.0301
Fig. 2B	Fly Climbing Assay	Motor Performance	One-Way ANOVA	15,15,15,15,15,15,15	Control vs. tau vs. tau/Trim28LOF-1	Day 5: F (5, 54)= 186.89	< 0.0001
						Day 9: F (5, 54)= 139.19	< 0.0001
						Day 14: F (5, 54)= 65.05	< 0.0001
						Day 19: F (5, 54)= 29.85	< 0.0001
			Tukey-Kramer Post-Hoc test		tau-1 vs. tau/Trim28LOF-1-1 (Days 5, 9, 14, 19)		< 0.001
					tau-1 vs. tau/Trim28LOF-1-2 (Days 5, 9, 14, 19)		< 0.001
					tau-2 vs. tau/Trim28LOF-1-1 (Days 5, 9, 14, 19)		< 0.001
					tau-2 vs. tau/Trim28LOF-1-2 (Days 5, 9, 14, 19)		< 0.001
Fig. 2C	Western Blot- Fly heads	tau levels	Student's t-test (two-tailed)	9,9	tau/GFP vs. tau/shTrim28	t=2.12 df=16	0.0009
Fig. 3B	Immunohistochemistry - SNc	Stereology - TH+ cells	One-Way ANOVA	6,6,11,9,6,6,11,9	Virus treatment	F (7, 56) = 12.08	< 0.0001
			Holm-Sidak Post-Hoc test		GFP+shScram Contra vs. GFP+shTrim28 Contra		> 0.9999
					GFP+shScram Contra vs. α-Syn+shScram Contra		0.9999
					GFP+shScram Contra vs. α-Syn+shTrim28 Contra		0.9998
					GFP+shScram Contra vs. GFP+shScram Ipsi		> 0.9999
					GFP+shScram Contra vs. GFP+shTrim28 Ipsi		> 0.9999
					GFP+shScram Contra vs. α-Syn+shScram Ipsi		< 0.0001
					GFP+shScram Contra vs. α-Syn+shTrim28 Ipsi		0.5322
					GFP+shTrim28 Contra vs. α-Syn+shScram Contra		0.9993
					GFP+shTrim28 Contra vs. α-Syn+shTrim28 Contra		0.9984
					GFP+shTrim28 Contra vs. GFP+shScram Ipsi		0.9998
					GFP+shTrim28 Contra vs. GFP+shTrim28 Ipsi		> 0.9999
					GFP+shTrim28 Contra vs. α-Syn+shScram Ipsi		< 0.0001
					GFP+shTrim28 Contra vs. α-Syn+shTrim28 Ipsi		0.3526
					α-Syn+shScram Contra vs. α-Syn+shTrim28 Contra		> 0.9999
					α-Syn+shScram Contra vs. GFP+shScram Ipsi		> 0.9999
					α-Syn+shScram Contra vs. GFP+shTrim28 Ipsi		> 0.9999
					α-Syn+shScram Contra vs. α-Syn+shScram Ipsi		< 0.0001
					α-Syn+shScram Contra vs. α-Syn+shTrim28 Ipsi		0.7299
					α-Syn+shTrim28 Contra vs. GFP+shScram Ipsi		> 0.9999
					α-Syn+shTrim28 Contra vs. GFP+shTrim28 Ipsi		> 0.9999
					α-Syn+shTrim28 Contra vs. α-Syn+shScram Ipsi		< 0.0001
					α-Syn+shTrim28 Contra vs. α-Syn+shTrim28 Ipsi		0.8638
					GFP+shScram Ipsi vs. GFP+shTrim28 Ipsi		> 0.9999
					GFP+shScram Ipsi vs. α-Syn+shScram Ipsi		< 0.0001
					GFP+shScram Ipsi vs. α-Syn+shTrim28 Ipsi		0.8638
					GFP+shTrim28 Ipsi vs. α-Syn+shScram Ipsi		< 0.0001
					GFP+shTrim28 Ipsi vs. α-Syn+shTrim28 Ipsi		0.6748
					α-Syn+shScram Ipsi vs. α-Syn+shTrim28 Ipsi		0.0004
	Immunohistochemistry - Striatum	TH+ optical density	One-Way ANOVA	5,6,9,9,5,6,9,9	Virus treatment	F (7, 50) = 3.785	0.0023
			Holm-Sidak Post-Hoc test		GFP+shScram Contra vs. GFP+shTrim28 Contra		> 0.9999
					GFP+shScram Contra vs. α-Syn+shScram Contra		0.9997
					GFP+shScram Contra vs. α-Syn+shTrim28 Contra		> 0.9999
					GFP+shScram Contra vs. GFP+shScram Ipsi		> 0.9999
					GFP+shScram Contra vs. GFP+shTrim28 Ipsi		> 0.9999
					GFP+shScram Contra vs. α-Syn+shScram Ipsi		0.0198
					GFP+shScram Contra vs. α-Syn+shTrim28 Ipsi		> 0.9999
					GFP+shTrim28 Contra vs. α-Syn+shScram Contra		0.9984
					GFP+shTrim28 Contra vs. α-Syn+shTrim28 Contra		> 0.9999
					GFP+shTrim28 Contra vs. GFP+shScram Ipsi		> 0.9999
					GFP+shTrim28 Contra vs. GFP+shTrim28 Ipsi		> 0.9999
					GFP+shTrim28 Contra vs. α-Syn+shScram Ipsi		0.0075
					GFP+shTrim28 Contra vs. α-Syn+shTrim28 Ipsi		> 0.9999
					α-Syn+shScram Contra vs. α-Syn+shTrim28 Contra		> 0.9999
					α-Syn+shScram Contra vs. GFP+shScram Ipsi		0.9984
					α-Syn+shScram Contra vs. GFP+shTrim28 Ipsi		> 0.9999
					α-Syn+shScram Contra vs. α-Syn+shScram Ipsi		0.0637
					α-Syn+shScram Contra vs. α-Syn+shTrim28 Ipsi		> 0.9999
					α-Syn+shTrim28 Contra vs. GFP+shScram Ipsi		> 0.9999
					α-Syn+shTrim28 Contra vs. GFP+shTrim28 Ipsi		> 0.9999
					α-Syn+shTrim28 Contra vs. α-Syn+shScram Ipsi		0.0201
					α-Syn+shTrim28 Contra vs. α-Syn+shTrim28 Ipsi		> 0.9999
					GFP+shScram Ipsi vs. GFP+shTrim28 Ipsi		> 0.9999
					GFP+shScram Ipsi vs. α-Syn+shScram Ipsi		0.0121
					GFP+shScram Ipsi vs. α-Syn+shTrim28 Ipsi		> 0.9999
					GFP+shTrim28 Ipsi vs. α-Syn+shScram Ipsi		0.0212
					GFP+shTrim28 Ipsi vs. α-Syn+shTrim28 Ipsi		> 0.9999
					α-Syn+shScram Ipsi vs. α-Syn+shTrim28 Ipsi		0.0219
Fig. 3C	Western Blot - Mouse Brain	pS129 α-Syn levels	Student's t-test (two-tailed)	7,5	α-Syn TG vs. α-Syn TG; Trim28+/-	t=3.543 df=10	0.0053
		α-Syn levels	Student's t-test (two-tailed)	7,5	α-Syn TG vs. α-Syn TG; Trim28+/-	t=3.270 df=10	0.0084
Fig. 3D	Immunohistochemistry - Mouse Brain	pS129 α-Syn levels	Student's t-test (two-tailed)	3,4	α-Syn TG vs. α-Syn TG; Trim28+/-	t=3.831 df=5	0.0122
Fig. 4A	Immunohistochemistry - Mouse hippocampus	pS129-α-Syn positive cells	One-Way ANOVA	3,3,3,3	Treatment group	F (3, 8) = 20.80	0.0004
	mThy-Syn TG "Line 61"		Holm-Sidak Post-Hoc test		WT-Ctrl vs. WT-TRIM28		> 0.9999
					WT-Ctrl vs. TG-Ctrl		0.4604
					WT-Ctrl vs. TG-TRIM28		0.0008
					WT-TRIM28 vs. TG-Ctrl		0.4604
					WT-TRIM28 vs. TG-TRIM28		0.0008
					TG-Ctrl vs. TG-TRIM28		0.0028
		GFAP positive cells	One-Way ANOVA	3,3,3,3	Treatment group	F (3, 8) = 24.16	0.0002
			Holm-Sidak Post-Hoc test		WT-Ctrl vs. WT-TRIM28		0.0713
					WT-Ctrl vs. TG-Ctrl		0.3563
					WT-Ctrl vs. TG-TRIM28		0.0021
					WT-TRIM28 vs. TG-Ctrl		0.0244
					WT-TRIM28 vs. TG-TRIM28		0.0002
					TG-Ctrl vs. TG-TRIM28		0.0053
		CA1 thickness	One-Way ANOVA	3,3,3,3	Treatment group	F (3, 8) = 24.75	0.0002
			Holm-Sidak Post-Hoc test		WT-Ctrl vs. WT-TRIM28		0.2404
					WT-Ctrl vs. TG-Ctrl		0.3795
					WT-Ctrl vs. TG-TRIM28		0.0003
					WT-TRIM28 vs. TG-Ctrl		0.5714
					WT-TRIM28 vs. TG-TRIM28		0.0013
					TG-Ctrl vs. TG-TRIM28		0.0009
Fig. 4B	Immunohistochemistry - Mouse hippocampus	pS396-tau positive cells	One-Way ANOVA	3,3,3,3	Treatment group	F (3, 9) = 13.41	0.0011
	P301S tau TG "PS19"		Holm-Sidak Post-Hoc test		WT-Ctrl vs. WT-TRIM28		0.7718
					WT-Ctrl vs. TG-Ctrl		0.6678
					WT-Ctrl vs. TG-TRIM28		0.0022
					WT-TRIM28 vs. TG-Ctrl		0.7718
					WT-TRIM28 vs. TG-TRIM28		0.0047
					TG-Ctrl vs. TG-TRIM28		0.007
		GFAP positive cells	One-Way ANOVA	3,3,3,3	Treatment group	F (3, 8) = 26.79	0.0002
			Holm-Sidak Post-Hoc test		WT-Ctrl vs. WT-TRIM28		0.1671
					WT-Ctrl vs. TG-Ctrl		0.0288
					WT-Ctrl vs. TG-TRIM28		0.0007
					WT-TRIM28 vs. TG-Ctrl		0.0068
					WT-TRIM28 vs. TG-TRIM28		0.0002
					TG-Ctrl vs. TG-TRIM28		0.0194
		CA1 thickness	One-Way ANOVA	3,3,3,3	Treatment group	F (3, 8) = 16.27	0.0009
			Holm-Sidak Post-Hoc test		WT-Ctrl vs. WT-TRIM28		0.7327
					WT-Ctrl vs. TG-Ctrl		0.5837
					WT-Ctrl vs. TG-TRIM28		0.0017
					WT-TRIM28 vs. TG-Ctrl		0.6471
					WT-TRIM28 vs. TG-TRIM28		0.0021
					TG-Ctrl vs. TG-TRIM28		0.0047
Fig. 5C	Stability assay	α-Syn decay	Comparison of fits	9,9	α-Syn; LV-Ctrl vs. α-Syn; LV-TRIM28	F (3,102) = 3.893	0.0111
		tau decay	Comparison of fits	9,9	tau; LV-Ctrl vs. tau; LV-TRIM28	F (3,102) = 6.977	0.0003
Fig. 6B	Bimolecular Fluorescence Complementation	% YFP positive cells	One-Way ANOVA	3,3,3,3,3,3	Treatment group	F (5, 12) = 1883	< 0.0001
	HeLa cells		Holm-Sidak Post-Hoc test		α-Syn:nYFP + tau:cYFP vs. α-Syn:nYFP + TRIM28:cYFP		< 0.0001
					α-Syn:nYFP + tau:cYFP vs. α-Syn:nYFP + MSK1:cYFP		< 0.0001
					α-Syn:nYFP + tau:cYFP vs. tau:nYFP + tau:cYFP		0.0026
					α-Syn:nYFP + tau:cYFP vs. tau:nYFP + TRIM28:cYFP		< 0.0001
					α-Syn:nYFP + tau:cYFP vs. tau:nYFP + MSK1:cYFP		< 0.0001
					α-Syn:nYFP + TRIM28:cYFP vs. α-Syn:nYFP + MSK1:cYFP		< 0.0001
					α-Syn:nYFP + TRIM28:cYFP vs. tau:nYFP + tau:cYFP		< 0.0001
					α-Syn:nYFP + TRIM28:cYFP vs. tau:nYFP + TRIM28:cYFP		0.0081
					α-Syn:nYFP + TRIM28:cYFP vs. tau:nYFP + MSK1:cYFP		< 0.0001
					α-Syn:nYFP + MSK1:cYFP vs. tau:nYFP + tau:cYFP		< 0.0001
					α-Syn:nYFP + MSK1:cYFP vs. tau:nYFP + TRIM28:cYFP		0.0006
					α-Syn:nYFP + MSK1:cYFP vs. tau:nYFP + MSK1:cYFP		0.9277
					tau:nYFP + tau:cYFP vs. tau:nYFP + TRIM28:cYFP		< 0.0001
					tau:nYFP + tau:cYFP vs. tau:nYFP + MSK1:cYFP		< 0.0001
					tau:nYFP + TRIM28:cYFP vs. tau:nYFP + MSK1:cYFP		0.0006
Fig. 6C	Immunofluorescence - Primary Mouse Neurons	α-Syn nuclear fraction	One-way ANOVA	3,3,3	Virus treatment	F (2, 6) = 26.56	0.001
			Dunnet's multiple comparison test		LV-CTRL vs. LV-TRIM28		0.0012
					LV-CTRL vs. LV-TRIM28-MT		0.1035
					LV-TRIM28 vs. LV-TRIM28-MT		0.0043
		tau nuclear fraction	One-way ANOVA	3,3,3	Virus treatment	F (2, 6) = 10.97	0.0099
			Dunnet's multiple comparison test		LV-CTRL vs. LV-TRIM28		0.0177
					LV-CTRL vs. LV-TRIM28-MT		0.6614
					LV-TRIM28 vs. LV-TRIM28-MT		0.0158
Fig. 7A	Immunofluorescence - PDD and Ctrl	% Dapi+TRIM28+Syn+ nuclei	Student's t-test (two-tailed)	4,4	Control vs. PDD	t=3.960 df=6	0.0075
	Human post-mortem medial frontal gyrus	% Dapi+TRIM28+ nuclei				t=1.198 df=6	0.2762
		% Dapi only nuclei				t=1.198 df=6	0.2762
Fig. 7B	Immunofluorescence - AD and Ctrl	% Dapi+TRIM28+Syn+ nuclei	Student's t-test (two-tailed)	5,5	Control vs. AD	t=2.550 df=8	0.0342
	Human post-mortem medial frontal gyrus	% Dapi+TRIM28+ nuclei				t=1.021 df=8	0.3369
		% Dapi only nuclei				t=3.286 df=8	0.0111
Fig.1-figure supplement 2	Flow Cytometry	Change in EGFP/DsRed Ratio - α-Syn - Red bars	One-way ANOVA	3,3,3	siRNA treatment	F (122, 246) = 149.8	<0.0001
			Dunnett's multiple comparison test		Scramble vs. ACVR1B/HSS100141		0.4617
					Scramble vs. ACVR1B/HSS100142		< 0.0001
					Scramble vs. ACVR1B/HSS100143		0.0785
					Scramble vs. ACVR2A/HSS100145		< 0.0001
					Scramble vs. ACVR2A/HSS100146		0.0008
					Scramble vs. ACVR2A/HSS190159		< 0.0001
					Scramble vs. ADK/HSS100225		0.9997
					Scramble vs. ADK/HSS100227		0.045
					Scramble vs. ADK/HSS175049		< 0.0001
					Scramble vs. ADPGK/HSS130138		< 0.0001
					Scramble vs. ADPGK/HSS188745		0.0439
					Scramble vs. ADPGK/HSS188746		0.0008
					Scramble vs. ATM/HSS181472		0.9982
					Scramble vs. ATM/HSS181473		< 0.0001
					Scramble vs. ATM/HSS181474		0.0936
					Scramble vs. BRD2/HSS184315		0.0045
					Scramble vs. BRD2/HSS184316		0.998
					Scramble vs. BRD2/HSS184317		< 0.0001
					Scramble vs. BRD4/HSS140720		< 0.0001
					Scramble vs. BRD4/HSS141059		< 0.0001
					Scramble vs. BRD4/HSS177440		0.999
					Scramble vs. CDC7/HSS112142		< 0.0001
					Scramble vs. CDC7/HSS112143		0.9985
					Scramble vs. CDC7/HSS188728		0.0379
					Scramble vs. CDKN3/HSS101746		< 0.0001
					Scramble vs. CDKN3/HSS101747		< 0.0001
					Scramble vs. CDKN3/HSS101748		< 0.0001
					Scramble vs. CILP/HSS112370		< 0.0001
					Scramble vs. CILP/HSS112371		< 0.0001
					Scramble vs. CILP/HSS189219		0.0001
					Scramble vs. CSNK1E/HSS102385		< 0.0001
					Scramble vs. CSNK1E/HSS102386		< 0.0001
					Scramble vs. CSNK1E/HSS175383		0.449
					Scramble vs. DUSP7/HSS102991		0.9797
					Scramble vs. DUSP7/HSS102992		0.9612
					Scramble vs. DUSP7/HSS102993		< 0.0001
					Scramble vs. ENPP2/HSS107785		< 0.0001
					Scramble vs. ENPP2/HSS107786		0.0997
					Scramble vs. ENPP2/HSS107787		< 0.0001
					Scramble vs. EPHA2/HSS103138		< 0.0001
					Scramble vs. EPHA2/HSS103140		0.6037
					Scramble vs. EPHA2/HSS176396		< 0.0001
					Scramble vs. FGFRL1/HSS140812		0.6177
					Scramble vs. FGFRL1/HSS140813		0.0734
					Scramble vs. FGFRL1/HSS141061		< 0.0001
					Scramble vs. GUCY2F/HSS104620		< 0.0001
					Scramble vs. GUCY2F/HSS104621		0.9579
					Scramble vs. GUCY2F/HSS104622		< 0.0001
					Scramble vs. INPP1/HSS105454		0.9998
					Scramble vs. INPP1/HSS105456		0.2835
					Scramble vs. INPP1/HSS179940		< 0.0001
					Scramble vs. MAPK1/HSS108535		< 0.0001
					Scramble vs. MAPK1/HSS108536		< 0.0001
					Scramble vs. MAPK1/HSS108537		< 0.0001
					Scramble vs. MAPK4/HSS108541		0.0001
					Scramble vs. MAPK4/HSS183367		< 0.0001
					Scramble vs. MAPK4/HSS183368		0.9983
					Scramble vs. MARK3/HSS106338		< 0.0001
					Scramble vs. MARK3/HSS181007		< 0.0001
					Scramble vs. MARK3/HSS181008		0.9997
					Scramble vs. MASTL/HSS131486		0.9987
					Scramble vs. MASTL/HSS131487		0.1063
					Scramble vs. MASTL/HSS189274		0.9995
					Scramble vs. MELK/HSS114847		< 0.0001
					Scramble vs. MELK/HSS114848		0.0108
					Scramble vs. MELK/HSS114849		0.4063
					Scramble vs. MKNK2/HSS178897		< 0.0001
					Scramble vs. MKNK2/HSS178898		0.9991
					Scramble vs. MKNK2/HSS178899		0.0007
					Scramble vs. MYLK/HSS140750		< 0.0001
					Scramble vs. MYLK/HSS140751		0.0273
					Scramble vs. MYLK/HSS181411		0.4182
					Scramble vs. PANK3/HSS128586		0.0252
					Scramble vs. PANK3/HSS188099		0.9994
					Scramble vs. PANK3/HSS188100		< 0.0001
					Scramble vs. PASK/HSS118312		0.1785
					Scramble vs. PASK/HSS118313		0.9985
					Scramble vs. PASK/HSS118314		0.6533
					Scramble vs. PDK1/HSS107770		0.0027
					Scramble vs. PDK1/HSS182159		< 0.0001
					Scramble vs. PDK1/HSS182160		0.9986
					Scramble vs. PDK2/HSS107773		0.83
					Scramble vs. PDK2/HSS107775		0.0976
					Scramble vs. PDK2/HSS182164		0.0001
					Scramble vs. PI4K2B/HSS124333		0.9993
					Scramble vs. PI4K2B/HSS124334		< 0.0001
					Scramble vs. PI4K2B/HSS124335		< 0.0001
					Scramble vs. PPFIA1/HSS112397		< 0.0001
					Scramble vs. PPFIA1/HSS189316		0.0037
					Scramble vs. PPFIA1/HSS189317		0.0002
					Scramble vs. PPP2CB/HSS108361		< 0.0001
					Scramble vs. PPP2CB/HSS182900		< 0.0001
					Scramble vs. PPP2CB/HSS182901		< 0.0001
					Scramble vs. RPS6KA6/HSS120634		< 0.0001
					Scramble vs. RPS6KA6/HSS120635		0.2881
					Scramble vs. RPS6KA6/HSS178426		0.0064
					Scramble vs. RPS6KB1/HSS184437		< 0.0001
					Scramble vs. RPS6KB1/HSS184438		< 0.0001
					Scramble vs. RPS6KB1/HSS184439		< 0.0001
					Scramble vs. SRPK2/HSS110212		< 0.0001
					Scramble vs. SRPK2/HSS110213		0.9189
					Scramble vs. SRPK2/HSS186100		< 0.0001
					Scramble vs. STK11/HSS110329		< 0.0001
					Scramble vs. STK11/HSS110330		< 0.0001
					Scramble vs. STK11/HSS110331		0.2186
					Scramble vs. TAOK1/HSS126430		< 0.0001
					Scramble vs. TAOK1/HSS126431		< 0.0001
					Scramble vs. TAOK1/HSS126432		< 0.0001
					Scramble vs. TEX14/HSS125436		0.5967
					Scramble vs. TEX14/HSS183432		< 0.0001
					Scramble vs. TEX14/HSS183433		0.481
					Scramble vs. TRIB2/HSS120718		< 0.0001
					Scramble vs. TRIB2/HSS120719		0.9919
					Scramble vs. TRIB2/HSS120720		< 0.0001
					Scramble vs. TRIM28/HSS115468		< 0.0001
					Scramble vs. TRIM28/HSS115469		< 0.0001
					Scramble vs. TRIM28/HSS115470		< 0.0001
					Scramble vs. TWF1/HSS108808		< 0.0001
					Scramble vs. TWF1/HSS108809		0.5547
					Scramble vs. TWF1/HSS108810		< 0.0001
	Flow Cytometry	Change in EGFP/DsRed Ratio - tau - Blue Bars	One-way ANOVA	3,3,3	siRNA treatment	F (122, 246) = 81.60	< 0.0001
			Dunnett's multiple comparison test		Scramble vs. ACVR1B/HSS100141		> 0.9999
					Scramble vs. ACVR1B/HSS100142		< 0.0001
					Scramble vs. ACVR1B/HSS100143		0.1355
					Scramble vs. ACVR2A/HSS100145		> 0.9999
					Scramble vs. ACVR2A/HSS100146		< 0.0001
					Scramble vs. ACVR2A/HSS190159		0.9917
					Scramble vs. ADK/HSS100225		> 0.9999
					Scramble vs. ADK/HSS100227		0.5244
					Scramble vs. ADK/HSS175049		> 0.9999
					Scramble vs. ADPGK/HSS130138		< 0.0001
					Scramble vs. ADPGK/HSS188745		> 0.9999
					Scramble vs. ADPGK/HSS188746		0.0165
					Scramble vs. ATM/HSS181472		> 0.9999
					Scramble vs. ATM/HSS181473		> 0.9999
					Scramble vs. ATM/HSS181474		0.7112
					Scramble vs. BRD2/HSS184315		0.9671
					Scramble vs. BRD2/HSS184316		0.9887
					Scramble vs. BRD2/HSS184317		> 0.9999
					Scramble vs. BRD4/HSS140720		0.0001
					Scramble vs. BRD4/HSS141059		> 0.9999
					Scramble vs. BRD4/HSS177440		> 0.9999
					Scramble vs. CDC7/HSS112142		< 0.0001
					Scramble vs. CDC7/HSS112143		0.9555
					Scramble vs. CDC7/HSS188728		0.0403
					Scramble vs. CDKN3/HSS101746		< 0.0001
					Scramble vs. CDKN3/HSS101747		> 0.9999
					Scramble vs. CDKN3/HSS101748		< 0.0001
					Scramble vs. CILP/HSS112370		0.7112
					Scramble vs. CILP/HSS112371		> 0.9999
					Scramble vs. CILP/HSS189219		> 0.9999
					Scramble vs. CSNK1E/HSS102385		< 0.0001
					Scramble vs. CSNK1E/HSS102386		< 0.0001
					Scramble vs. CSNK1E/HSS175383		> 0.9999
					Scramble vs. DUSP7/HSS102991		0.8868
					Scramble vs. DUSP7/HSS102992		0.0998
					Scramble vs. DUSP7/HSS102993		> 0.9999
					Scramble vs. ENPP2/HSS107785		< 0.0001
					Scramble vs. ENPP2/HSS107786		> 0.9999
					Scramble vs. ENPP2/HSS107787		0.0885
					Scramble vs. EPHA2/HSS103138		< 0.0001
					Scramble vs. EPHA2/HSS103140		0.6306
					Scramble vs. EPHA2/HSS176396		> 0.9999
					Scramble vs. FGFRL1/HSS140812		< 0.0001
					Scramble vs. FGFRL1/HSS140813		< 0.0001
					Scramble vs. FGFRL1/HSS141061		< 0.0001
					Scramble vs. GUCY2F/HSS104620		0.0089
					Scramble vs. GUCY2F/HSS104621		0.0474
					Scramble vs. GUCY2F/HSS104622		< 0.0001
					Scramble vs. INPP1/HSS105454		0.0003
					Scramble vs. INPP1/HSS105456		> 0.9999
					Scramble vs. INPP1/HSS179940		< 0.0001
					Scramble vs. MAPK1/HSS108535		< 0.0001
					Scramble vs. MAPK1/HSS108536		< 0.0001
					Scramble vs. MAPK1/HSS108537		< 0.0001
					Scramble vs. MAPK4/HSS108541		< 0.0001
					Scramble vs. MAPK4/HSS183367		< 0.0001
					Scramble vs. MAPK4/HSS183368		0.6258
					Scramble vs. MARK3/HSS106338		0.0091
					Scramble vs. MARK3/HSS181007		0.0007
					Scramble vs. MARK3/HSS181008		0.0011
					Scramble vs. MASTL/HSS131486		> 0.9999
					Scramble vs. MASTL/HSS131487		< 0.0001
					Scramble vs. MASTL/HSS189274		> 0.9999
					Scramble vs. MELK/HSS114847		< 0.0001
					Scramble vs. MELK/HSS114848		0.0001
					Scramble vs. MELK/HSS114849		> 0.9999
					Scramble vs. MKNK2/HSS178897		> 0.9999
					Scramble vs. MKNK2/HSS178898		> 0.9999
					Scramble vs. MKNK2/HSS178899		0.6973
					Scramble vs. MYLK/HSS140750		> 0.9999
					Scramble vs. MYLK/HSS140751		> 0.9999
					Scramble vs. MYLK/HSS181411		> 0.9999
					Scramble vs. PANK3/HSS128586		> 0.9999
					Scramble vs. PANK3/HSS188099		> 0.9999
					Scramble vs. PANK3/HSS188100		> 0.9999
					Scramble vs. PASK/HSS118312		0.5822
					Scramble vs. PASK/HSS118313		> 0.9999
					Scramble vs. PASK/HSS118314		0.9898
					Scramble vs. PDK1/HSS107770		< 0.0001
					Scramble vs. PDK1/HSS182159		< 0.0001
					Scramble vs. PDK1/HSS182160		< 0.0001
					Scramble vs. PDK2/HSS107773		> 0.9999
					Scramble vs. PDK2/HSS107775		0.4319
					Scramble vs. PDK2/HSS182164		< 0.0001
					Scramble vs. PI4K2B/HSS124333		< 0.0001
					Scramble vs. PI4K2B/HSS124334		> 0.9999
					Scramble vs. PI4K2B/HSS124335		0.9539
					Scramble vs. PPFIA1/HSS112397		0.0189
					Scramble vs. PPFIA1/HSS189316		0.0076
					Scramble vs. PPFIA1/HSS189317		0.7776
					Scramble vs. PPP2CB/HSS108361		< 0.0001
					Scramble vs. PPP2CB/HSS182900		< 0.0001
					Scramble vs. PPP2CB/HSS182901		< 0.0001
					Scramble vs. RPS6KA6/HSS120634		< 0.0001
					Scramble vs. RPS6KA6/HSS120635		< 0.0001
					Scramble vs. RPS6KA6/HSS178426		> 0.9999
					Scramble vs. RPS6KB1/HSS184437		> 0.9999
					Scramble vs. RPS6KB1/HSS184438		> 0.9999
					Scramble vs. RPS6KB1/HSS184439		> 0.9999
					Scramble vs. SRPK2/HSS110212		< 0.0001
					Scramble vs. SRPK2/HSS110213		0.0336
					Scramble vs. SRPK2/HSS186100		0.0035
					Scramble vs. STK11/HSS110329		> 0.9999
					Scramble vs. STK11/HSS110330		< 0.0001
					Scramble vs. STK11/HSS110331		< 0.0001
					Scramble vs. TAOK1/HSS126430		< 0.0001
					Scramble vs. TAOK1/HSS126431		0.9998
					Scramble vs. TAOK1/HSS126432		0.0203
					Scramble vs. TEX14/HSS125436		< 0.0001
					Scramble vs. TEX14/HSS183432		> 0.9999
					Scramble vs. TEX14/HSS183433		< 0.0001
					Scramble vs. TRIB2/HSS120718		< 0.0001
					Scramble vs. TRIB2/HSS120719		0.321
					Scramble vs. TRIB2/HSS120720		< 0.0001
					Scramble vs. TRIM28/HSS115468		< 0.0001
					Scramble vs. TRIM28/HSS115469		< 0.0001
					Scramble vs. TRIM28/HSS115470		< 0.0001
					Scramble vs. TWF1/HSS108808		0.3845
					Scramble vs. TWF1/HSS108809		> 0.9999
					Scramble vs. TWF1/HSS108810		< 0.0001
	Flow Cytometry	Change in EGFP/DsRed Ratio - GFP (ctrl) - White bars	One-way ANOVA	3,3,3	siRNA treatment	F (122, 246) = 15.99	< 0.0001
			Dunnett's multiple comparison test		Scramble vs. ACVR1B/HSS100141		> 0.9999
					Scramble vs. ACVR1B/HSS100142		0.7825
					Scramble vs. ACVR1B/HSS100143		0.0441
					Scramble vs. ACVR2A/HSS100145		0.9918
					Scramble vs. ACVR2A/HSS100146		0.058
					Scramble vs. ACVR2A/HSS190159		> 0.9999
					Scramble vs. ADK/HSS100225		0.3667
					Scramble vs. ADK/HSS100227		0.4901
					Scramble vs. ADK/HSS175049		> 0.9999
					Scramble vs. ADPGK/HSS130138		< 0.0001
					Scramble vs. ADPGK/HSS188745		> 0.9999
					Scramble vs. ADPGK/HSS188746		> 0.9999
					Scramble vs. ATM/HSS181472		> 0.9999
					Scramble vs. ATM/HSS181473		> 0.9999
					Scramble vs. ATM/HSS181474		> 0.9999
					Scramble vs. BRD2/HSS184315		0.9994
					Scramble vs. BRD2/HSS184316		0.3793
					Scramble vs. BRD2/HSS184317		> 0.9999
					Scramble vs. BRD4/HSS140720		> 0.9999
					Scramble vs. BRD4/HSS141059		0.9402
					Scramble vs. BRD4/HSS177440		< 0.0001
					Scramble vs. CDC7/HSS112142		0.0361
					Scramble vs. CDC7/HSS112143		> 0.9999
					Scramble vs. CDC7/HSS188728		0.9898
					Scramble vs. CDKN3/HSS101746		0.0037
					Scramble vs. CDKN3/HSS101747		> 0.9999
					Scramble vs. CDKN3/HSS101748		0.9956
					Scramble vs. CILP/HSS112370		0.0104
					Scramble vs. CILP/HSS112371		> 0.9999
					Scramble vs. CILP/HSS189219		0.0231
					Scramble vs. CSNK1E/HSS102385		0.0005
					Scramble vs. CSNK1E/HSS102386		< 0.0001
					Scramble vs. CSNK1E/HSS175383		> 0.9999
					Scramble vs. DUSP7/HSS102991		0.5848
					Scramble vs. DUSP7/HSS102992		0.9958
					Scramble vs. DUSP7/HSS102993		0.9922
					Scramble vs. ENPP2/HSS107785		> 0.9999
					Scramble vs. ENPP2/HSS107786		< 0.0001
					Scramble vs. ENPP2/HSS107787		> 0.9999
					Scramble vs. EPHA2/HSS103138		0.9093
					Scramble vs. EPHA2/HSS103140		0.983
					Scramble vs. EPHA2/HSS176396		0.9986
					Scramble vs. FGFRL1/HSS140812		0.1618
					Scramble vs. FGFRL1/HSS140813		0.1257
					Scramble vs. FGFRL1/HSS141061		0.975
					Scramble vs. GUCY2F/HSS104620		> 0.9999
					Scramble vs. GUCY2F/HSS104621		0.9998
					Scramble vs. GUCY2F/HSS104622		> 0.9999
					Scramble vs. INPP1/HSS105454		0.8023
					Scramble vs. INPP1/HSS105456		0.9999
					Scramble vs. INPP1/HSS179940		> 0.9999
					Scramble vs. MAPK1/HSS108535		< 0.0001
					Scramble vs. MAPK1/HSS108536		> 0.9999
					Scramble vs. MAPK1/HSS108537		> 0.9999
					Scramble vs. MAPK4/HSS108541		> 0.9999
					Scramble vs. MAPK4/HSS183367		> 0.9999
					Scramble vs. MAPK4/HSS183368		0.9993
					Scramble vs. MARK3/HSS106338		0.0052
					Scramble vs. MARK3/HSS181007		0.0076
					Scramble vs. MARK3/HSS181008		0.8937
					Scramble vs. MASTL/HSS131486		> 0.9999
					Scramble vs. MASTL/HSS131487		0.9309
					Scramble vs. MASTL/HSS189274		> 0.9999
					Scramble vs. MELK/HSS114847		> 0.9999
					Scramble vs. MELK/HSS114848		0.9714
					Scramble vs. MELK/HSS114849		> 0.9999
					Scramble vs. MKNK2/HSS178897		< 0.0001
					Scramble vs. MKNK2/HSS178898		> 0.9999
					Scramble vs. MKNK2/HSS178899		0.9922
					Scramble vs. MYLK/HSS140750		< 0.0001
					Scramble vs. MYLK/HSS140751		> 0.9999
					Scramble vs. MYLK/HSS181411		0.3793
					Scramble vs. PANK3/HSS128586		0.3667
					Scramble vs. PANK3/HSS188099		> 0.9999
					Scramble vs. PANK3/HSS188100		0.0117
					Scramble vs. PASK/HSS118312		> 0.9999
					Scramble vs. PASK/HSS118313		> 0.9999
					Scramble vs. PASK/HSS118314		> 0.9999
					Scramble vs. PDK1/HSS107770		> 0.9999
					Scramble vs. PDK1/HSS182159		0.9981
					Scramble vs. PDK1/HSS182160		0.0006
					Scramble vs. PDK2/HSS107773		0.1546
					Scramble vs. PDK2/HSS107775		> 0.9999
					Scramble vs. PDK2/HSS182164		0.4768
					Scramble vs. PI4K2B/HSS124333		0.4543
					Scramble vs. PI4K2B/HSS124334		> 0.9999
					Scramble vs. PI4K2B/HSS124335		> 0.9999
					Scramble vs. PPFIA1/HSS112397		< 0.0001
					Scramble vs. PPFIA1/HSS189316		0.1546
					Scramble vs. PPFIA1/HSS189317		> 0.9999
					Scramble vs. PPP2CB/HSS108361		0.9996
					Scramble vs. PPP2CB/HSS182900		0.286
					Scramble vs. PPP2CB/HSS182901		> 0.9999
					Scramble vs. RPS6KA6/HSS120634		0.0012
					Scramble vs. RPS6KA6/HSS120635		0.028
					Scramble vs. RPS6KA6/HSS178426		> 0.9999
					Scramble vs. RPS6KB1/HSS184437		0.7972
					Scramble vs. RPS6KB1/HSS184438		< 0.0001
					Scramble vs. RPS6KB1/HSS184439		0.4781
					Scramble vs. SRPK2/HSS110212		< 0.0001
					Scramble vs. SRPK2/HSS110213		0.9983
					Scramble vs. SRPK2/HSS186100		0.3918
					Scramble vs. STK11/HSS110329		> 0.9999
					Scramble vs. STK11/HSS110330		< 0.0001
					Scramble vs. STK11/HSS110331		0.9995
					Scramble vs. TAOK1/HSS126430		0.9999
					Scramble vs. TAOK1/HSS126431		0.8376
					Scramble vs. TAOK1/HSS126432		0.0121
					Scramble vs. TEX14/HSS125436		> 0.9999
					Scramble vs. TEX14/HSS183432		0.033
					Scramble vs. TEX14/HSS183433		> 0.9999
					Scramble vs. TRIB2/HSS120718		< 0.0001
					Scramble vs. TRIB2/HSS120719		0.983
					Scramble vs. TRIB2/HSS120720		0.8655
					Scramble vs. TRIM28/HSS115468		0.9999
					Scramble vs. TRIM28/HSS115469		0.9993
					Scramble vs. TRIM28/HSS115470		0.9485
					Scramble vs. TWF1/HSS108808		0.9995
					Scramble vs. TWF1/HSS108809		> 0.9999
					Scramble vs. TWF1/HSS108810		> 0.9999
Fig. 1-figure supplement 3C	Western Blot - Mouse Primary Neurons	α-Syn levels	One Way ANOVA	4,4,3,4	shRNA +/- cDNA rescue treatment	F (3, 11) = 8.285	0.0037
			Holm-Sidak Post-Hoc test		LV-Ctrl + shScram vs. LV-Ctrl + shTrim28		0.2008
					LV-Ctrl + shScram vs. LV-TRIM28 + shScram		0.2008
					LV-Ctrl + shScram vs. LV-TRIM28 + shTrim28		0.0744
					LV-Ctrl + shTrim28 vs. LV-TRIM28 + shScram		0.0191
					LV-Ctrl + shTrim28 vs. LV-TRIM28 + shTrim28		0.0051
					LV-TRIM28 + shScram vs. LV-TRIM28 + shTrim28		0.594
		tau levels	One-Way ANOVA	4,4,3,4	shRNA +/- cDNA rescue treatment	F (3, 11) = 42.99	< 0.0001
			Holm-Sidak Post-Hoc test		LV-Ctrl + shScram vs. LV-Ctrl + shTrim28		0.0793
					LV-Ctrl + shScram vs. LV-TRIM28 + shScram		< 0.0001
					LV-Ctrl + shScram vs. LV-TRIM28 + shTrim28		0.0002
					LV-Ctrl + shTrim28 vs. LV-TRIM28 + shScram		< 0.0001
					LV-Ctrl + shTrim28 vs. LV-TRIM28 + shTrim28		< 0.0001
					LV-TRIM28 + shScram vs. LV-TRIM28 + shTrim28		0.1854
Fig. 1-figure supplement 3D	qRT-PCR - HEK293T cells	SNCA expression	One-Way ANOVA	4,4,4	shRNA treatment	F (2, 9) = 17.41	0.0008
			Holm-Sidak Post-Hoc test		shScram vs. shTRIM28-1		0.1388
					shScram vs. shTRIM28-2		0.0006
		MAPT expression	One-Way ANOVA	4,4,4	shRNA treatment	F (2, 9) = 4.813	0.0379
			Holm-Sidak Post-Hoc test		shScram vs. shTRIM28-1		0.1811
					shScram vs. shTRIM28-2		0.2553
		TRIM28 expression	One-Way ANOVA	4,4,4	shRNA treatment	F (2, 9) = 165.0	< 0.0001
			Holm-Sidak Post-Hoc test		shScram vs. shTRIM28-1		< 0.0001
					shScram vs. shTRIM28-2		< 0.0001
	qRT-PCR - Mouse Brain	Snca expression	Student's t-test (two-tailed)	3,3	WT vs. Trim28+/-	t=0.5896 df=4	0.5871
		Mapt expression	Student's t-test (two-tailed)	3,3	WT vs. Trim28+/-	t=0.3299 df=4	0.7581
		Trim28 expression	Student's t-test (two-tailed)	3,3	WT vs. Trim28+/-	t=3.458 df=4	0.0259
Fig. 1-figure supplement 3E	Western Blot - HEK293T cells	TDP43 levels	Student's t-test (two-tailed)	3,3	shScramble vs. shTRIM28-1	t=0.6370 df=4	0.5588
		APP levels	Student's t-test (two-tailed)	3,3	shScramble vs. shTRIM28-1	t=0.6139 df=4	0.5725
		ATXN1 levels	Student's t-test (two-tailed)	3,3	shScramble vs. shTRIM28-1	t=0.01224 df=4	0.9908
		FUS levels	Student's t-test (two-tailed)	3,3	shScramble vs. shTRIM28-1	t=1.197 df=4	0.2974
Fig. 2-figure supplement 1	Fly Climbing Assay	Motor performance	Two-Way ANOVA	15,15	Control vs. Trim28LOF-1	Day 12: F (1, 18) = 0.2323	0.6357
						Day 16: F (1, 18) = 0.6768	0.4215
						Day 20: F (1, 18) = 0.8219	0.3766
				15,15	tau vs. tau/Trim28LOF-2	Day 13: F (1, 20)= 3.3664	0.0815
						Day 20: F (1, 20)= 9.0780	0.0069
						Day 25: F (1, 20)= 82.6563	< 0.0001
			Tukey-Kramer Post-Hoc test		tau-1 vs. tau/Trim28LOF-2 (Day 20)		P = 0.0069
					tau-1 vs. tau/Trim28LOF-2 (Day 25)		< 0.0001
	Fly Eye Quantification	Ommatidia (% control)	One-Way ANOVA		tau/GFP vs. tau/dsTrim28	F(1,6) = 38.2156	0.0008
Fig.2-figure supplement 2	qRT-PCR - Drosophila Gal4 levels	Elav-Gal4 driver	Student's t-test		Control vs. Trim28LOF-1	t=0.82 df = 2	0.4944
		GMR-Gal4 driver	Student's t-test		Control vs. dsTrim28	t= 9.39 df=4	0.0007
		Rh1-Gal4 driver	Student's t-test		Control vs. dsTrim28	t=1.09 df=6	0.317
Fig. 3-figure supplement 1	Histology - SNc	Nissl positive cell quantification	One-Way ANOVA	7,6,6,6,7,6,6,6	Virus treatment	F (7, 44) = 3.960	0.002
			Holm-Sidak Post-Hoc test		GFP+shScram Contra vs. GFP+shTrim28 Contra		> 0.9999
					GFP+shScram Contra vs. α-Syn+shScram Contra		> 0.9999
					GFP+shScram Contra vs. α-Syn+shTrim28 Contra		> 0.9999
					GFP+shScram Contra vs. GFP+shScram Ipsi		> 0.9999
					GFP+shScram Contra vs. GFP+shTrim28 Ipsi		> 0.9999
					GFP+shScram Contra vs. α-Syn+shScram Ipsi		0.0113
					GFP+shScram Contra vs. α-Syn+shTrim28 Ipsi		0.9971
					GFP+shTrim28 Contra vs. α-Syn+shScram Contra		> 0.9999
					GFP+shTrim28 Contra vs. α-Syn+shTrim28 Contra		> 0.9999
					GFP+shTrim28 Contra vs. GFP+shScram Ipsi		0.9998
					GFP+shTrim28 Contra vs. GFP+shTrim28 Ipsi		> 0.9999
					GFP+shTrim28 Contra vs. α-Syn+shScram Ipsi		0.0032
					GFP+shTrim28 Contra vs. α-Syn+shTrim28 Ipsi		0.9453
					α-Syn+shScram Contra vs. α-Syn+shTrim28 Contra		> 0.9999
					α-Syn+shScram Contra vs. GFP+shScram Ipsi		> 0.9999
					α-Syn+shScram Contra vs. GFP+shTrim28 Ipsi		> 0.9999
					α-Syn+shScram Contra vs. α-Syn+shScram Ipsi		0.0045
					α-Syn+shScram Contra vs. α-Syn+shTrim28 Ipsi		0.9868
					α-Syn+shTrim28 Contra vs. GFP+shScram Ipsi		> 0.9999
					α-Syn+shTrim28 Contra vs. GFP+shTrim28 Ipsi		> 0.9999
					α-Syn+shTrim28 Contra vs. α-Syn+shScram Ipsi		0.016
					α-Syn+shTrim28 Contra vs. α-Syn+shTrim28 Ipsi		0.9998
					GFP+shScram Ipsi vs. GFP+shTrim28 Ipsi		> 0.9999
					GFP+shScram Ipsi vs. α-Syn+shScram Ipsi		0.0381
					GFP+shScram Ipsi vs. α-Syn+shTrim28 Ipsi		> 0.9999
					GFP+shTrim28 Ipsi vs. α-Syn+shScram Ipsi		0.0084
					GFP+shTrim28 Ipsi vs. α-Syn+shTrim28 Ipsi		0.9933
					α-Syn+shScram Ipsi vs. α-Syn+shTrim28 Ipsi		0.154
Fig. 4-figure supplement 1	Western Blot - Mouse hippocampus	pS129-α-Syn levels	One-Way ANOVA	3,4,3,3	Treatment group	F (3, 9) = 42.70	< 0.0001
	mThy-Syn TG "Line 61"		Holm-Sidak Post-Hoc test		WT-Ctrl vs. WT-TRIM28		0.9395
					WT-Ctrl vs. TG-Ctrl		0.0029
					WT-Ctrl vs. TG-TRIM28		< 0.0001
					WT-TRIM28 vs. TG-Ctrl		0.0028
					WT-TRIM28 vs. TG-TRIM28		< 0.0001
					TG-Ctrl vs. TG-TRIM28		0.0029
		α-Syn levels	One-Way ANOVA	3,4,3,3	Treatment group	F (3, 9) = 78.64	< 0.0001
			Holm-Sidak Post-Hoc test		WT-Ctrl vs. WT-TRIM28		0.1135
					WT-Ctrl vs. TG-Ctrl		< 0.0001
					WT-Ctrl vs. TG-TRIM28		< 0.0001
					WT-TRIM28 vs. TG-Ctrl		< 0.0001
					WT-TRIM28 vs. TG-TRIM28		< 0.0001
					TG-Ctrl vs. TG-TRIM28		0.0074
	Western Blot - Mouse hippocampus	pS396-tau levels	One-Way ANOVA	5,6,4,5	Treatment group	F (3, 16) = 9.567	0.0007
	P301S tau TG "PS19"		Holm-Sidak Post-Hoc test		WT-Ctrl vs. WT-TRIM28		0.6167
					WT-Ctrl vs. TG-Ctrl		0.268
					WT-Ctrl vs. TG-TRIM28		0.0012
					WT-TRIM28 vs. TG-Ctrl		0.3569
					WT-TRIM28 vs. TG-TRIM28		0.0018
					TG-Ctrl vs. TG-TRIM28		0.0521
		tau levels	One-Way ANOVA	5,6,4,5	Treatment group	F (3, 17) = 15.59	< 0.0001
			Holm-Sidak Post-Hoc test		WT-Ctrl vs. WT-TRIM28		0.1053
					WT-Ctrl vs. TG-Ctrl		0.0084
					WT-Ctrl vs. TG-TRIM28		< 0.0001
					WT-TRIM28 vs. TG-Ctrl		0.1053
					WT-TRIM28 vs. TG-TRIM28		0.0008
					TG-Ctrl vs. TG-TRIM28		0.0266
Fig. 5-figure supplement 1	Stability assay for RNA	α-Syn decay	Comparison of fits	3,3	α-Syn; LV-Ctrl vs. α-Syn; LV-TRIM28	F (3,24) = 0.02052	0.9959
		tau decay	Comparison of fits	3,3	tau; LV-Ctrl vs. tau; LV-TRIM28	F (3,24) = 0.2485	0.8616
Fig. 6-figure supplement 1	Western Blot - Mouse Primary Neurons	α-Syn levels	One-Way ANOVA	4,3,4	Treatment group	F (2, 8) = 14.55	0.0022
	Cytoplasmic fraction		Holm-Sidak Post-Hoc test		LV-Ctrl vs. LV-TRIM28		0.0019
					LV-Ctrl vs. LV-TRIM28-Mut		0.0374
					LV-TRIM28 vs. LV-TRIM28-Mut		0.0296
		tau levels	One-Way ANOVA	4,3,4	Treatment group	F (2, 7) = 112.1	< 0.0001
			Holm-Sidak Post-Hoc test		LV-Ctrl vs. LV-TRIM28		< 0.0001
					LV-Ctrl vs. LV-TRIM28-Mut		0.7113
					LV-TRIM28 vs. LV-TRIM28-Mut		< 0.0001
	Western Blot - Mouse Primary Neurons	α-Syn levels	One-Way ANOVA	4,3,4	Treatment group	F (2, 8) = 15.61	0.0017
	Nuclear fraction		Holm-Sidak Post-Hoc test		LV-Ctrl vs. LV-TRIM28		0.0017
					LV-Ctrl vs. LV-TRIM28-Mut		0.1309
					LV-TRIM28 vs. LV-TRIM28-Mut		0.0085
		tau levels	One-Way ANOVA	4,3,4	Treatment group	F (2, 8) = 16.71	0.0014
			Holm-Sidak Post-Hoc test		LV-Ctrl vs. LV-TRIM28		0.0025
					LV-Ctrl vs. LV-TRIM28-Mut		0.867
					LV-TRIM28 vs. LV-TRIM28-Mut		0.0025
Fig. 6-figure supplement 2	Co-Immunoprecipitation	% TRIM28 bound to α-Syn	Student's t-test (two-tailed)	3,3	TRIM28-WT vs TRIM28-Mut	t=1.71 df=4	0.1624
	HEK293T cells
		% TRIM28 bound to tau	Student's t-test (two-tailed)	3,3	TRIM28-WT vs TRIM28-Mut	t=3.053 df=4	0.0379
Fig. 7-figure supplement 1	Western Blot - PDD and Ctrl	TRIM28 enrichment (Formic acid soluble vs. Ripa soluble)	Student's t-test (two-tailed) with Welch's correction	8,10	Control vs. PDD	t=2.617 df=7.135	0.034
	Human post-mortem medial frontal gyrus
	Western Blot - AD and Ctrl	TRIM28 enrichment (Formic acid soluble vs. Ripa soluble)	Student's t-test (two-tailed) with Welch's correction	5,5	Control vs. AD	t=3.396 df=4.059	0.0268
	Human post-mortem medial frontal gyrus
	Western Blot - PSP and Ctrl	TRIM28 enrichment (Formic acid soluble vs. Ripa soluble)	Student's t-test (two-tailed) with Welch's correction	5,5	Control vs. PSP	t=3.075 df=4.366	0.033
	Human post-mortem pons
Fig. 7-figure supplement 2	Western Blot (Subcellular Fractionation) - PDD and Ctrl	α-Syn Nuclear enrichment (Fold over control)	Student's t-test (two-tailed) with Welch's correction	9,10	Ctrl vs. PDD	t=2.488 df=10.16	0.0318
	Human post-mortem medial frontal gyrus	tau Nuclear enrichment (Fold over control)	Student's t-test (two-tailed) with Welch's correction	9,10	Ctrl vs. PDD	t=0.9784 df=15.91	0.3425
	Western Blot (Subcellular Fractionation) - PSP and Ctrl	α-Syn Nuclear enrichment (Fold over control)	Student's t-test (two-tailed) with Welch's correction	10,10	Ctrl vs. PSP	t=2.618 df=11.92	0.0226
	Human post-mortem pons	tau Nuclear enrichment (Fold over control)	Student's t-test (two-tailed) with Welch's correction	10,10	Ctrl vs. PSP	t=2.693 df=9.998	0.0226
	Western Blot (Subcellular Fractionation) - AD and Ctrl	α-Syn Nuclear enrichment (Fold over control)	Student's t-test (two-tailed) with Welch's correction	9,10	Ctrl vs. AD	t=2.540 df=9.913	0.0296
	Human post-mortem medial frontal gyrus	tau Nuclear enrichment (Fold over control)	Student's t-test (two-tailed) with Welch's correction	9,10	Ctrl vs. AD	t=2.564 df=9.037	0.0304
