# Supplementary material for: TRIM28 regulates the nuclear accumulation and toxicity of both alpha-synuclein and tau
Source: eLife. 2016 Oct 25;5:e19809. doi: 10.7554/eLife.19809 (PMC5104516; doi:10.7554/eLife.19809)
Supplement: Supplementary file 2. — First tab shows antibodies used including concentration and application. Second tab shows shRNA sequences used. Third tab shows Plasmids used and cloning approach if applicable. Fourth tab shows qRT-PCR primers used. DOI: http://dx.doi.org/10.7554/eLife.19809.025 [file elife-19809-supp2.xlsx]

## Sheet: Antibodies
Antibodies (alphabetical)	Clone, Provider (Cat #)	Species	Application	Concentration
APP	22C11, Millipore (MAB348)	Mouse	Western blot	1:1,000
α-synuclein	Clone 42; BD Transduction Laboratories (610787)	Mouse	Western blot	1:1,000
			Immunofluorescence	1:100
	C-20; Santa Cruz Biotechnology (sc-7011-R)	Rabbit	Western blot	1:2,000
			Immunofluorescence	1:50
			Immunoprecipitation	1-5 µg
Atxn1	11750, In house	Rabbit	Western blot	1:1,000
DsRed	Clontec (632496)	Rabbit	Western blot	1:2,000
			Immunofluorescence	1:500
Fus	Proteintech (11570-1-AP)	Rabbit	Western blot	1:5,000
Gapdh	6C5, Advanced Immunochemical Inc. (2-RGM2)	Mouse	Western blot	1:20,000
GFAP	G-A-5, Sigma Aldrich (G3893)	Mouse	Immunohistochemistry	1:1,000
GFP	Genetex (GTX26556)	Rabbit	Western blot	1:2,000
HA	16B12, Biolegend	Mouse	Western blot	1:2,000
Histone H3	CT - Pan, Millipore (07-690)	Rabbit	Western blot	1:20,000
Lamin A	Abcam (ab8980)	Rabbit	Western blot	1:500
Lamin C	LC28.26, DSHB	Mouse	Western blot	1:2,000
Myc	9E10, Sigma Aldrich (M4439)	Mouse	Western blot	1:2,000
pS129 α-synuclein	Abcam (ab59264)	Rabbit	Western blot	1:1,000
			Immunohistochemistry	1:500
pS396 tau	EPR2731, Abcam (ab109390)	Rabbit	Western blot	1:5,000
			Immunohistochemistry	1:2,000
pS396/S404 tau	PHF1, Gift, Dr. Peter Davies	Mouse	Western blot	1:1,000
tau	tau-5; Abcam (ab80579)	Mouse	Western blot	1:1,000
			Immunofluorescence	1:100
			Immunoprecipitation	1-5 µg
	Dako (A002401-2)	Rabbit	Western blot	1:2,000
			Immunofluorescence	1:100
	T14, ThermoFisher (13-1400)	Mouse	Western blot	1:3,000
TDP43	2E2-D3, Abcam (ab57105)	Mouse	Western blot	1:2,000
TH	Immunostar (22941)	Mouse	Western blot	1:5,000
			Immunofluorescence	1:2,000
			Immunohistochemistry	1:5,000
Trim28	20C1; Abcam (ab22553)	Mouse	Western blot	1:5,000
			Immunofluorescence	1:500
	C42G12; Cell Signaling Technology ( 4124S)	Rabbit	Immunofluorescence	1:100
turbo-GFP	Clone 2H8, Origene (TA150041)	Mouse	Immunofluorescence	1:100
Vinculin	hVIN-1; Sigma-Aldrich (V9131)	Mouse	Western blot	1:25,000
pS = phospho-Serine

## Sheet: shRNAs
shRNA Target	Sequence (5'→3')	Species
Scramble	ATCTCGCTTGGGCGAGAGTAAG	-
TRIM28	CACTGAGGACTACAACCTT	Human
	CCCATGTGTCAGGTGTGAA
SNCA	CCAGTCATGACATTTCTCA
MAPT	GCTGGCTTGTGATCTTAAA
Trim28	GTCAGATGATCCCTATTCA	Mouse
	CCCAGGAACACATTTTGCGTT
	ATCATGGTGAGATGAAGTTTC
	CGGACTACAATCTGATTGTTA

## Sheet: Plasmids
Plasmid name	cDNA insert, (mutation)	Tag(s)	Backbone	Primer (subcloning, 5'→3')	Direction	Source
pKH3	-	HA	pKH3			Macara Lab, Addgene #12555
pKH3-TRIM28	TRIM28					Zhu Lab, Addgene #45569
pKH3-TRIM28-Mut	TRIM28, C65A/C68A			CAGGCGCTCTCTGGCCACGCCGGCGTGCTCCAGCAGC	Forward (Mutagenesis)
				GCTGCTGGAGCACGCCGGCGTGGCCAGAGAGCGCCTG	Reverse (Mutagenesis)
pLV-mCherry	-	mCherry	pLenti-MP2			Tsoulfas Lab, Addgene #36084
pLV-mCherry-TRIM28	TRIM28			CGCTCTAGAATGGCGGCCTCCGCGGCGGC	Forward (XbaI)
				GCGGGATCCGGGGCCATCACCAGGGCCAC	Reverse (BamHI)
pLV-mCherry-TRIM28-Mut	TRIM28, C65A/C68A			CGCTCTAGAATGGCGGCCTCCGCGGCGGC	Forward (XbaI)
				GCGGGATCCGGGGCCATCACCAGGGCCAC	Reverse (BamHI)
pLenti-DsRed-IRES-EGFP	-	DsRed, EGFP	pLenti-GPS-GAW			In house modified
pLenti-DsRed-IRES-SNCA:EGFP	SNCA			CAACCATCGATATGGATGTATTCAT	Forward (ClaI)
				CTCTTCTCGAGGGCTTCAGGTTCGT	Reverse (XhoI)
pLenti-DsRed-IRES-MAPT:EGFP	MAPT-441			CAACCATCGATATGGCTGAGCCCCGC	Forward (ClaI)
				CTCTTCTCGAGCAAACCCTGCTTGGCC	Reverse (XhoI)
pINDUCER20-α-Syn:Myc	SNCA	Myc	pINDUCER20	LR of pENTR SNCA		Westbrook/Elledge, Addgene #44012
pINDUCER20-tau:Myc	MAPT-441	Myc	pINDUCER20	LR of pENTR MAPT-441
L302-Ctrl ("GFP")	-	Myc, GFP	L302			Südhof Lab, Stanford/HHMI
L302-Myc:α-Syn-IRES-GFP ("α-Syn")	SNCA
pBABE:nYFP	-	nYFP	pBABE			Songyang Lab, BCM
pBABE:cYFP		cYFP
pBABE:nYFP:α-Syn	SNCA	nYFP		LR of pENTR SNCA
pBABE:nYFP:tau	MAPT-441			LR of pENTR MAPT-441
pBABE:cYFP:tau	MAPT-441	cYFP
pBABE:cYFP:TRIM28	TRIM28			LR of pENTR TRIM28
pBABE:cYFP:MSK1	MSK1			LR of pENTR MSK1
pGIPz-shRNA	-	turbo-GFP	pGIPz	sequences from "shRNAs"		Open Biosystems
pZIP-shERWOOD shRNA	-	zsGreen	pZIP	sequences from "shRNAs"		Transomic Technologies

## Sheet: qRT-PCR primers
Gene target	Sequence (5'→3')	Direction	Species
TRIM28	CCATTGTCAAGGAGGAGGAG	Forward	Human
	AGCACAGGTTTGGTCTCAGG	Reverse	Human
SNCA	CCACAGGAAGGAATTCTGGA	Forward	Human
	GGCTTCAGGTTCGTAGTCTTG	Reverse	Human
SNCA:Myc		Forward	Human (transgene)
		Reverse	Human (transgene)
MAPT	TTGGGTCCCTGGACAATATC	Forward	Human
	GTGGTCTGTCTTGGCTTTGG	Reverse	Human
MAPT:Myc		Forward	Human (transgene)
		Reverse	Human (transgene)
GAPDH	CGACCACTTTGTCAAGCTCA	Forward	Human
	TTACTCCTTGGAGGCCATGT	Reverse	Human
Trim28	AGCGGGTGAAATACACCAAG	Forward	Mouse
	TCGCTCTCCATCTCGAGTCT	Reverse	Mouse
Snca	GGCAGCTGGAAAGACAAAAG	Forward	Mouse
	CCACTGCTCCTCCAACATTT	Reverse	Mouse
Mapt	TTCTCCTCCGCTGTCCTCTT	Forward	Mouse
	AGGGTCAGCCATACTGGTTC	Reverse	Mouse
Hprt	AGCAGTACAGCCCCAAAATG	Forward	Mouse
	GGCCTGTATCCAACACTTCG	Reverse	Mouse
Gal4	TATTTCCACCACCGCTCTAACC	Forward	Drosophila (transgene)
	AGTTCTTTGTGCTGCATCGC	Reverse	Drosophila (transgene)
rp49	CCCAAGGGTATCGACAACAGA	Forward	Drosophila
	CGATCTCGCCGCAGTAAAC	Reverse	Drosophila

## Sheet: Fly lines
Figure (used in)	Assay	Panel	Genotype
Fig. 2	Eye morphology	Control	w; GMR-Gal4/+
		dsTrim28	w; GMR-Gal4/P{KK108237}VIE-260B; +/+
		tau/GFP	w; GMR-Gal4, UAS-tau19y; UAS-eGFP
		tau/dsTrim28	w; GMR-Gal4, UAS-tau19y/P{KK108237}VIE-260B
	Climbing	Control	Elav-Gal4/w; +; +
		tau	Elav-Gal4/+; +; UAS-tau31o/+
		tau/Trim28LOF-1	Elav-Gal4/+; +; UAS-tau31o/P{EPg}bonHP32434
	Levels	tau/GFP	w; Rh1-Gal4/+; UAS-tau31o/UAS eGFP
		tau/dsTrim28	w; Rh1-Gal4/P{KK108237}VIE-260B; UAS-tau31o/+
		Negative control	w; Rh1-Gal4; +
Fig. 2-figure supplement 1	Climbing	Control	Elav-Gal4/w; +; +
		Trim28LOF-1	Elav-Gal4/+; +; P{EPg}bonHP32434/+
		tau	Elav-Gal4/+; +; UAS-tau31o/+
		tau/Trim28LOF-2	Elav-Gal4/+; +; UAS-tau31o/bon[21B]
		Trim28LOF-2	Elav-Gal4/+; +; bon[21B]/+
