# Supplementary material for: TRIM28 regulates the nuclear accumulation and toxicity of both alpha-synuclein and tau
Source: eLife. 2016 Oct 25;5:e19809. doi: 10.7554/eLife.19809 (PMC5104516; doi:10.7554/eLife.19809)
Supplement: Supplementary file 3. — Demographics, pathological assessment, post-mortem delay and tissue studied are presented. DOI: http://dx.doi.org/10.7554/eLife.19809.026 [file elife-19809-supp3.xlsx]

## Sheet: Neuropath PM list
ID	FDX	CERAD	BRAAK	AGE	SEX	RACE	PMD	FR
4	Control with few NFT			63	F	W	22	MFG and PONS
39	Control			63	M	W	30-34	MFG and PONS
85	Control, FEW NFT			65	F	AA	33	MFG and PONS
107	Control, old Infarct			71	M	W	14	MFG and PONS
123	Control, Nft ERC			80	F	W	N/A	MFG and PONS
155	Control, min tau, old infarct			72	M	W	24	MFG and PONS
189	Control, Nft ERC			71	F	W	17	MFG and PONS
305	Control			60	M	B	12	MFG and PONS
323	Control			63	F	W	23	MFG and PONS
507	Control			87	F	W	35	MFG and PONS
2053	PD w/Dementia			75	M	W	6	MFG
2071	PD w/Dementia	0	1	76	M	W	17	MFG
2101	PD w/Dementia	0	3	60	M	W	15.5	MFG
2138	PD w/Dementia, Neuro. Degen, Occipital Infarct	0	4	83	M	W	5	MFG
2140	PD w/Dementia	0	4	84	F	W	11	MFG
2445	PD w/Dementia, mixed dementia PD + Vasc, PD	0	4	84	M	W	12	MFG
2448	PD	0	2	73	M	W	12.5	MFG
2450	PD w/Dementia, Neurofib. Degen.	0	4	79	M	W	21	MFG
2544	PD w/Dementia	B	4	89	M	W	16	MFG
2545	PD, Neurofib. Degen., Cerebrovasc (Not contributing)	0	4	95	F	W	14	MFG
1553	PSP			77	F	W	8	PONS
1715	PSP			77	F	W	2	PONS
1798	PSP			76	F	W		PONS
1827	PSP			72	F	W	15	PONS
1831	PSP			72	M	W	11	PONS
2114	PSP	0	3	79	M	B	12	PONS
2121	PSP	0	4	85	M	W	7	PONS
2147	PSP	0	4	87	F	W	17	PONS
2159	PSP, Cerebrovasc (Not contributing)	0	0	74	F	W	20	PONS
2421	PSP, Cerebrovasc (Not contributing)	0	4	66	M	W	9.5	PONS
2332	AD	C	6	88	F	W	17	MFG
2338	AD	C	6	87	M	W	7	MFG
2344	AD	C	5	86	M	W	5	MFG
2417	AD	B	6	61	F	W	5	MFG
2423	AD	B	6	89	F	W	7	MFG
2447	AD	C	6	65	M	W	11	MFG
2454	AD	C	6	62	F	W	18	MFG
2464	AD	C	6	52	M	W	4.5	MFG
2494	AD	C	4	81	F	W	15	MFG
2495	AD	C	5	67	M	W	6	MFG
Legend
FDX	Final diagnosis
CERAD	CERAD Neuropathology Assessment Score
BRAAK	Braak staging score
PMD	Post mortem delay
FR	Brain region selected for analysis
F	Female
M	Male
W	White/Caucasian
AA	African American
B	Black
Nft	Neurofibrillary tangle
ERC	Entorhinal Cortex
PD	Parkinson's disease
PSP	Progressive supranuclear palsy
AD	Alzheimer's disease
MFG	Medial frontal gyrus
